# Supplementary material for: Liquid-assisted mechanochemical synthesis of thioamide building blocks with the Lawesson reagent: ex situ monitoring and detection of intermediate polymorphs
Source: Royal Society of Chemistry journal article supplement (doi:10.1039/d4mr00013g), 2024-01-01
Supplement: d4mr00013g1.pdf [file d4mr00013g1.pdf]

Supporting Information

**Liquid-assisted mechanochemical synthesis of thioamide building blocks with Lawesson reagent. Ex-situ monitoring and detection of intermediate polymorphs.**

*Carlos Naranjo-Castañeda,<sup>a</sup> Marco A. Leyva-Ramírez,<sup>a</sup> and Eusebio Juaristi<sup>a,b,\*</sup>*

ORCID: 0009-0008-8332-1091, 0000-0003-4423-3116, and 0000-0003-0936-7020, respectively.

<sup>a</sup>*Departamento de Química, Centro de Investigación y de Estudios Avanzados, Avenida IPN # 2508, Col. San Pedro Zacatenco, 07360 Ciudad de México, México.*

<sup>b</sup>*El Colegio Nacional, Donceles # 104, Centro Histórico, 06000 Ciudad de México, México*

*Email [ejarist@cinvestav.mx](mailto:ejarist@cinvestav.mx)*

**Contenido**

|                                         |     |
|-----------------------------------------|-----|
| General Information .....               | S2  |
| Preparation of substrates .....         | S3  |
| Tables .....                            | S5  |
| NMR spectra .....                       | S9  |
| Mass spectra.....                       | S21 |
| HPLC Chromatograms.....                 | S22 |
| X-ray Powder Diffraction Analysis ..... | S26 |
| References.....                         | S31 |

## General Information

$^1\text{H}$  and  $^{13}\text{C}$  NMR spectra were recorded on a 500 MHz Jeol spectrometer operating at 500 MHz for  $^1\text{H}$  and at 126 MHz for  $^{13}\text{C}$  nuclei in  $\text{CDCl}_3$  or  $\text{DMSO-}d_6$  solvent, and using TMS as an internal reference. The recorded spectra were analyzed using the MestReNova software and documented in the following order: chemical displacements ( $\delta$ ) are expressed in parts per million (ppm), multiplicities are expressed with standard abbreviations such as s (singlet), d (doublet), t (triplet), q (quartet), m (multiplet), dd (doublet of doublets), ddd (doublet of doublets of doublets), etc. The coupling constants ( $J$ ) are expressed in Hertz (Hz).

X-Ray Powder Diffraction analysis was carried out in Bragg-Bentano mode on a BRUKER D8-ADVANCE eco diffractometer equipped with a LynxEye detector ( $\lambda_{\text{Cu-K}\alpha 1+2} = 1.541874 \text{ \AA}$ ). Data were collected at room temperature in the range of  $2\theta = 5\text{-}45^\circ$  (step of 0.02, step time 0.5 s).

The photographs included below were taken with a 64 MP camera from a Zeiss Standard 25 trinocular Biological Microscope. Includes: Binocular phototube  $35^\circ/20$  with sliding prism 100 obs /100 doc with 10x eyepieces. Mechanical stage 75x30 R with ceramic-coated stage surface and specimen holder.

Melting points were recorded on a Buchi B-540 melting point apparatus.

Low-resolution mass spectra were obtained using an Agilent Technologies simple quadrupole equipment provided with electrospray ionization, while the high-resolution mass spectra were obtained by electrospray ionization time-of-flight mass spectrometry (ESI-TOF). HPLC was performed using a Thermo Scientific Dionex Ultimate 3000 with a diode array detector with a chiral stationary phase with CHIRALPACK AS-H columns.

The grinding experiments were carried out in a RETSCH MM200 and MM400 mixing mills using various milling jars: acrylic with a capacity of 7.5 mL, Teflon with a capacity of 8 mL, stainless steel with a capacity of 7 mL, and agate with a capacity of 5 mL. Balls made of different materials were used: copper (11 mm, 5.6 g), Teflon (10 mm, 1.7 g), stainless steel (12 mm, 6.8 g) and agate (15 mm, 4.8 g). All reactions were controlled by thin layer chromatography (TLC); The products were purified by silica gel column chromatography (400 mesh size silica gel) using combinations of ethyl acetate and hexane as the eluent.

## Preparation of substrates

The procedures reported in the literature for the preparation of the amides were followed.

### Preparation of benzamide.

The procedure reported<sup>1</sup> was followed with minor modifications. Thionyl chloride (8.92 mL, 123 mmol, 1.5 equiv.) was added dropwise to a stirring solution of benzoic acid (10.0 g, 82 mmol, 1.0 equiv.) in dry CH<sub>2</sub>Cl<sub>2</sub> (240 mL) and dry DMF (6 drops) at 0 °C. The solution was allowed to stir at room temperature for 6 hours and the resulting solution was evaporated to dryness and redissolved in CH<sub>2</sub>Cl<sub>2</sub> (10 mL) before dropwise addition to a flask containing KOH (9.2 g, 164 mmol, 2.0 equiv.) and NH<sub>4</sub>Cl (5.2 g, 98 mmol, 1.2 eq.) in H<sub>2</sub>O/MeCN (1:5, 340 mL) at 0 °C. The resulting biphasic mixture was heated overnight before addition of methanol (80 mL) and concentration to dryness. The crude product was then purified through a pad of silica gel (eluent CH<sub>2</sub>Cl<sub>2</sub>: MeOH, 8:2) to obtain benzamide in yield 95% (9.4g).

<sup>1</sup>H NMR (500 MHz, DMSO-*d*<sub>6</sub>) δ 7.95 (br. s, 1H); 7.36 (br. s, 1H), 7.89–7.84 (m, 2H), 7.53–7.48 (m, 1H), 7.46–7.41 (m, 2H),

<sup>13</sup>C NMR (126 MHz, DMSO-*d*<sub>6</sub>) δ 168.43, 134.79, 131.74, 128.71, 127.96.

### Preparation of amino acid amides

For the preparation of amino acid amides, the procedures reported in the literature were followed<sup>2,3</sup> with commercial amino acids of Gly, Ala, Val, Phe, Pro, Tpr protected with Fmoc (fluorenylmethoxycarbonyl).

The N-Fmoc protected amino acid (1.0 mmol) was dissolved in THF, before addition of NMM (1.5 mmol) and ClCO<sub>2</sub>Et (1.5 mmol) at –15 °C, followed by the addition of (NH<sub>4</sub>)<sub>2</sub>CO<sub>3</sub> (1.5 mmol). The reaction mixture was stirred until the reaction was complete (the progress of the reaction was verified by TLC). Following removal of THF solvent, the product was extracted in ethyl acetate (15 mL) and the organic layer was washed with dilute HCl solution (10 mL), then with aqueous Na<sub>2</sub>CO<sub>3</sub> solution (twice with 15 mL), water (15 mL), and brine (15 mL). The organic phase was dried over anhydrous sodium sulfate, filtered, and concentrated under vacuum. The spectra of NMR of amino acid amides were correlated with those reported in the literature.

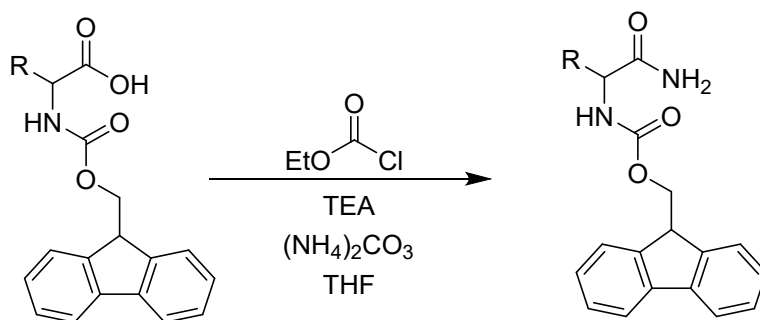

| Entry | Primary Amide              | Yield (%) <sup>a</sup> |
|-------|----------------------------|------------------------|
| 1     | Fmoc-L-Gly-NH <sub>2</sub> | 96.1                   |
| 2     | Fmoc-L-Ala-NH <sub>2</sub> | 92.5                   |
| 3     | Fmoc-L-Val-NH <sub>2</sub> | 90.3                   |
| 4     | Fmoc-L-Phe-NH <sub>2</sub> | 92.3                   |
| 5     | Fmoc-L-Pro-NH <sub>2</sub> | 86.1                   |

<sup>a</sup>Isolated yield.

### Fmoc Gly-NH<sub>2</sub>

<sup>1</sup>H NMR (500 MHz, DMSO-*d*<sub>6</sub>) δ: 7.89 (d, *J* = 7.5 Hz, 2H), 7.72 (d, *J* = 7.4 Hz, 2H), 7.42 (m, 2H), 7.33 (t, *J* = 7.4 Hz, 2H), 7.26 (br. s, 1H), 6.98 (br. s, 1H), , 4.29 (d, *J* = 7.1 Hz, 2H), , 4.23 (m, 1H), 3.56 (d, *J* = 6.15, 2H). <sup>13</sup>C NMR (126 MHz, DMSO-*d*<sub>6</sub>) δ 171.62, 156.99, 144.41, 141.26, 128.16, 127.61, 125.80, 120.64, 66.20, 47.20, 43.78.

### Fmoc- L-AlaNH<sub>2</sub>

<sup>1</sup>H NMR (500 MHz, DMSO-*d*<sub>6</sub>) δ: 7.89 (d, *J* = 8.5 Hz, 2H), 7.74 (d, *J* = 6.7 Hz, 2H), 7.41 (m, 2H), 7.34 (t, *J* = 7.4 Hz, 2H), 7.29 (br. s, 1H), 6.95 (br. s, 1H), 4.27 (d, *J* = 7.7 Hz, 2H), 4.22 (m, 1H), 3.98 (m, 1H), 1.32 (d, *J*=7 Hz, 3H). <sup>13</sup>C NMR (126 MHz, DMSO-*d*<sub>6</sub>) δ: 209.71, 155.69, 144.50, 141.33, 128.12, 127.56, 125.70, 120.51, 66.48, 56.68, 47.47, 21.73.

### Fmoc- L-ValNH<sub>2</sub>

<sup>1</sup>H NMR (500 MHz, DMSO-*d*<sub>6</sub>) δ: 0.86 (d, *J* = 6.8 Hz, 3H), 0.87 (d, *J* = 7.0 Hz, 3H), 1.96 (ddd, *J* = 6.8, 7.0, 8.2 Hz), 3.80 (dd, *J* = 7.6, 8.2 Hz, 1H), 4.22–4.29 (m, 3H), 7.04 (br. s, 1H), 7.29–7.44, 7.75, 7.90 (m, d, d, *J* = 5.9, 7.5 Hz, 6H).

<sup>13</sup>C NMR (126 MHz, DMSO-*d*<sub>6</sub>) δ: 173.1, 156.0, 143.8, 143.7, 140.6, 127.5, 127.0, 125.3, 120.0, 65.6, 60.0, 46.6, 30.1, 19.2, 18.0.

### Fmoc-L-PheNH<sub>2</sub>

<sup>1</sup>H NMR (500 MHz, DMSO-*d*<sub>6</sub>) δ: 7.16–7.43, 7.54, 7.64, 7.88 (m, d, t, d, *J* = 8.8, 8.2, 7.6 Hz, 9H, 1H, 2H, 2H, NHCH, C6H5, Fmoc), 7.45 (br. s, 1H), 7.08 (br. s, 1H), 4.11–4.20 (m, 4H), 3.0 (dd, *J* = 4.2, 13.6 Hz, 1H), 2.78 (dd, *J* = 10.6, 13.6 Hz, 1H); <sup>13</sup>C NMR (126 MHz, DMSO-*d*<sub>6</sub>) δ: 173.4, 155.8, 143.8, 140.7, 138.3, 129.2, 128.0, 127.6, 127.0, 126.2, 125.4, 125.3, 120.1, 65.6, 46.6, 56.1, 37.5.

### Fmoc-Pro-L-NH<sub>2</sub>

<sup>1</sup>H NMR (500 MHz, DMSO-*d*<sub>6</sub>) δ: 7.89 (t, *J* = 6.7 Hz, 2H), 7.67 (t, *J* = 6.7 Hz, 2H), 7.52 (1H, br. s, NH), 7.42 (t, *J* = 7.3 Hz, 2H), 7.37–7.30 (m, 3H), 7.10 (br. s, 1H), 6.92 (br. s, 1H), 4.31–4.24 (m, 1H), 4.27 (s, 2H), 4.29–4.11 (m, 1H), 4.11–4.05 (m, 1H) 3.51–3.30 (m, 2H) 2.26–2.15 (m, 1H), 2.13–2.01 (m, 1H), 1.95–1.86 (m, 1H), 1.87–1.76 (m, 1H), 1.88–1.76 (, m, 2H); <sup>13</sup>C NMR (126 MHz, DMSO-*d*<sub>6</sub>) δ: 174.2, 173.9, 154.1, 144.0, 143.8, 143.8, 143.7, 140.8, 140.6, 127.7, 127.2, 127.2, 125.5, 125.2, 120.1, 67.0, 66.5, 59.8, 59.5, 47.1, 46.7, 46.4, 31.4, 30.1, 23.9, 23.0.

## Tables

**Table S1.** Yields of the thioamides obtained thionation of the corresponding amides with Lawesson's reagent under mechanochemical activation (see Figure 1 in the main text).

| Thioamide | Assay <sup>a</sup> | Yield (%) <sup>b</sup> |
|-----------|--------------------|------------------------|
| 1         | 1                  | 95.2                   |
|           | 2                  | 96.5                   |
| 2         | 1                  | 89.1                   |
|           | 2                  | 93.3                   |
| 3         | 1                  | 91.4                   |
|           | 2                  | 89.0                   |
| 4         | 1                  | 88.2                   |
|           | 2                  | 89.2                   |
| 5         | 1                  | 88.4                   |
|           | 2                  | 87.6                   |
| 6         | 1                  | 83.4                   |
|           | 2                  | 81.3                   |
| 7         | 1                  | 80.0                   |
|           | 2                  | 78.5                   |
| 8         | 1                  | 71.2                   |
|           | 2                  | 69.1                   |
| 9         | 1                  | 86.6                   |
|           | 2                  | 89.2                   |
| 10        | 1                  | 84.3                   |
|           | 2                  | 86.1                   |
| 11        | 1                  | 89.4                   |
|           | 2                  | 87.5                   |

<sup>a</sup>Each of the reactions was carried out in duplicate, <sup>b</sup>Isolated yield.

**Table S2.** Characterization of thioamides obtained by the thionation method with the Lawesson's reagent under mechanochemical activation.

|                                                                                                                                            |                                                                                                                                                                                                                                                                                                                                                                                                                                                                                                                                                                                                                                                                                                                                                                                                                                           |
|--------------------------------------------------------------------------------------------------------------------------------------------|-------------------------------------------------------------------------------------------------------------------------------------------------------------------------------------------------------------------------------------------------------------------------------------------------------------------------------------------------------------------------------------------------------------------------------------------------------------------------------------------------------------------------------------------------------------------------------------------------------------------------------------------------------------------------------------------------------------------------------------------------------------------------------------------------------------------------------------------|
| 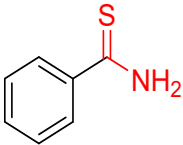 <p>Benzothioamide (1)</p>                                | <p>Pale yellow solid purified by silica gel column chromatography using <i>n</i>-hexane:ethyl acetate (3:1 v/v) as eluent; <math>R_f = 0.23</math>. mp 116.2-116.9 °C. <math>^1\text{H-NMR}</math> (500 MHz, <math>\text{DMSO-}d_6</math>): <math>\delta</math> 9.87 (br. s, 1H), 9.5 (br. s, 1H), 7.88-7.90 (m, 2H), 7.54-7.47 (m, 1H), 7.45-7.38 (m, 2H). <math>^{13}\text{C-NMR}</math> (126 MHz, <math>\text{DMSO-}d_6</math>) <math>\delta</math> 200.20, 139.49, 131.12, 127.91, 127.25. Calculated <math>m/z</math> for <math>\text{C}_7\text{H}_7\text{NS} + 1</math>, 138.03 (100.0%), found 138.1.</p>                                                                                                                                                                                                                          |
|  <p><i>N</i>-methylbenzothioamide (2)</p>                 | <p>Pale yellow solid purified by silica gel column chromatography using <i>n</i>-hexane:ethyl acetate (3:1 v/v) as eluent; <math>R_f = 0.3</math>. mp 75-76 °C. <math>^1\text{H-NMR}</math> (500 MHz, <math>\text{CDCl}_3</math>): <math>\delta</math> 7.84 (br. s, 1H), 7.71-7.69 (m, 2H), 7.45-7.41 (m, 1H), 7.37-7.32 (m, 2H), 3.29 (d, <math>J = 4.9</math> Hz, 3H). <math>^{13}\text{C-NMR}</math> (126 MHz, <math>\text{CDCl}_3</math>) <math>\delta</math> 200.19, 141.68, 131.14, 128.57, 126.70, 33.80. Calculated <math>m/z</math> for <math>\text{C}_8\text{H}_9\text{NS} + 1</math>, 152.05 (100.0%), found 152.1.</p>                                                                                                                                                                                                        |
|  <p><i>N</i>-(1-Phenylethyl)ethanethioamide (3)</p>       | <p>Pale yellow solid purified by silica gel column chromatography using <i>n</i>-hexane:ethyl acetate (3:1 v/v) as eluent; <math>R_f = 0.28</math>. mp 58-59.5 °C. <math>^1\text{H-NMR}</math> (500 MHz, <math>\text{CDCl}_3</math>): <math>\delta</math> 7.62 (br. s, 1H, NH), 7.36-7.31 (m, 4H), 7.28 (m, 1H), 5.71 (m, 1H), 2.50 (s, 3H), 1.6 (d, <math>J = 6.9</math> Hz, 3H). <math>^{13}\text{C-NMR}</math> (126 MHz, <math>\text{CDCl}_3</math>) <math>\delta</math> 199.58, 141.24, 128.86, 127.92, 126.65, 54.89, 34.45, 20.03. Calculated <math>m/z</math> for <math>\text{C}_{10}\text{H}_{13}\text{NS} + 1</math>, 180.08 (100.0%), found 180.1.</p>                                                                                                                                                                          |
|  <p>2-(4-Isobutylphenyl)propanethioamide (4)</p>        | <p>Light yellow solid purified by silica gel column chromatography using <i>n</i>-hexane:ethyl acetate (3:1 v/v) as eluent; <math>R_f = 0.28</math>). mp 85-86.5 °C. <math>^1\text{H-NMR}</math> (500 MHz, <math>\text{CDCl}_3</math>) <math>\delta</math> 7.64 (br. s, 1H), 7.65 (br. s, 1H), 7.25-7.21 (m, 2H), 7.15-7.11 (m, 2H), 4.0 (q, <math>J = 7.2</math> Hz, 1H), 2.45 (d, <math>J = 7.1</math> Hz, 2H), 1.83 (dq, <math>J = 7, 7.2, 13.8</math> Hz), 1.66 (d, <math>J = 7.24</math> Hz, 3H), 0.88 (d, <math>J = 6.6</math> Hz, 6H). <math>^{13}\text{C-NMR}</math> (126 MHz, <math>\text{CDCl}_3</math>) <math>\delta</math> 213.39, 141.52, 138.06, 129.96, 127.39, 53.49, 45.10, 30.29, 22.50, 21.48. Calculated <math>m/z</math> for <math>\text{C}_{13}\text{H}_{19}\text{NS} + 1</math>, 222.12 (100.0%), found 222.2.</p> |
|  <p><i>N</i>-Benzylbenzothioamide (5)</p>               | <p>Pale yellow solid purified by silica gel column chromatography using <i>n</i>-hexane:ethyl acetate (3:1 v/v) as eluent; <math>R_f = 0.10</math>). mp 84-85 °C. <math>^1\text{H-NMR}</math> (500 MHz, <math>\text{CDCl}_3</math>) <math>\delta</math> 7.76-7.72 (m, 3H), 7.47-7.33 (m, 8H, NH), 4.93 (d, <math>J = 5.2</math> Hz, 2H). <math>^{13}\text{C-NMR}</math> (126 MHz, <math>\text{CDCl}_3</math>) <math>\delta</math> 199.28, 141.80, 136.29, 131.31, 129.17, 128.67, 128.51, 128.37, 126.83, 51.18. Calculated <math>m/z</math> for <math>\text{C}_{14}\text{H}_{13}\text{NS} + 1</math>, 228.08 (100.0%), found 228.1.</p>                                                                                                                                                                                                  |
|  <p>Methyl 3-ethanethioamido-3-phenylpropanoate (6)</p> | <p>Pale yellow semisolid purified by silica gel column chromatography using <i>n</i>-hexane:ethyl acetate (3:1 v/v) as eluent; <math>R_f = 0.10</math>). <math>^1\text{H-NMR}</math> (500 MHz, <math>\text{CDCl}_3</math>) <math>\delta</math> 8.48 (br. s, 1H), 6.35-6.25 (m, 5H), 6.02 (dt, <math>J = 5.5, 8.5</math> Hz, 1H), 3.60 (s, 3H), 3.08 (dd, <math>J = 5, 16.2</math> Hz, 1H), 2.94 (dd, <math>J = 5, 16.2</math> Hz, 1H), 2.56 (s, 3H). <math>^{13}\text{C-NMR}</math> (126 MHz, <math>\text{CDCl}_3</math>) <math>\delta</math> 200.59, 171.96, 138.68, 128.91, 128.08, 126.54, 55.24, 52.10, 37.97, 34.40. Calculated <math>m/z</math> for <math>\text{C}_{12}\text{H}_{15}\text{NO}_2\text{S} + 1</math>, 238.08 (100.0%), found 238.1.</p>                                                                               |

|                                                                                                                                                                                            |                                                                                                                                                                                                                                                                                                                                                                                                                                                                                                                                                                                                                                                                                                                                                                                                                                                                                                                                 |
|--------------------------------------------------------------------------------------------------------------------------------------------------------------------------------------------|---------------------------------------------------------------------------------------------------------------------------------------------------------------------------------------------------------------------------------------------------------------------------------------------------------------------------------------------------------------------------------------------------------------------------------------------------------------------------------------------------------------------------------------------------------------------------------------------------------------------------------------------------------------------------------------------------------------------------------------------------------------------------------------------------------------------------------------------------------------------------------------------------------------------------------|
| 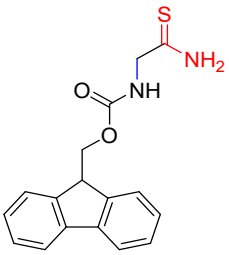 <p>(9H-Fluoren-9-yl)methyl (2-amino-2-thioxoethyl)carbamate (<b>7</b>)</p>                               | <p>Pale yellow solid purified by silica gel column chromatography using <i>n</i>-hexane:ethyl acetate (3:1 v/v) as eluent; <math>R_f = 0.23</math>. mp 188.2-190 °C. <math>^1\text{H-NMR}</math> (500 MHz, <math>\text{DMSO-}d_6</math>) <math>\delta</math> 9.71 (br. s, 1H), 9.08 (br. s, 1H), 7.89 (d, <math>J = 7.6</math> Hz, 2H), 7.73 (d, <math>J = 7.6</math> Hz, 2H), 7.7 (m, 1H), 7.41 (t, <math>J = 7.5</math> Hz, 2H), 7.33 (t, <math>J = 7.5</math> Hz, 2H), 4.29 (d, <math>J = 6.5</math> Hz, 2H), 4.23 (t, <math>J = 6.9</math> Hz), 3.88 (d, <math>J = 6.14</math>, 2H). <math>^{13}\text{C-NMR}</math> (126 MHz, <math>\text{DMSO-}d_6</math>) <math>\delta</math> 204.25, 156.85, 144.38, 141.25, 128.18, 127.62, 125.86, 120.66, 66.33, 51.19, 47.17. Calculated <math>m/z</math> for <math>\text{C}_{17}\text{H}_{16}\text{N}_2\text{O}_2\text{S} + 1</math>, 313.09 (100.0%), found 313.1.</p>             |
|  <p>(9H-Fluoren-9-yl)methyl (S)-(1-amino-1-thioxopropan-2-yl)carbamate (<b>8</b>)</p>                     | <p>Pale yellow solid purified by silica gel column chromatography using <i>n</i>-hexane:ethyl acetate (3:1 v/v) as eluent; <math>R_f = 0.25</math>. mp 190.2-191.3 °C. <math>^1\text{H-NMR}</math> (500 MHz, <math>\text{DMSO-}d_6</math>) <math>\delta</math> 9.34 (br. s, 1H, S=CNH), 8.91 (br. s, 1H), 7.86 (d, <math>J = 7.6</math> Hz, 2H), 7.69 (t, <math>J = 7.7</math> Hz, 2H), 7.41 (t, <math>J = 7.5</math> Hz, 2H), 7.33 (t, <math>J = 7.5</math> Hz, 2H), 7.02 (br. s, 1H), 4.41 (m, 1H), 4.30 (m, 2H), 4.23 (t, <math>J = 7</math> Hz, 1H), 1.34 (d, <math>J = 7</math> Hz, 3H). <math>^{13}\text{C-NMR}</math> (126 MHz, <math>\text{DMSO-}d_6</math>) <math>\delta</math> 209.71, 155.69, 144.50, 141.33, 128.12, 127.56, 125.70, 120.51, 66.48, 56.68, 47.47, 21.73. Calculated <math>m/z</math> for <math>\text{C}_{18}\text{H}_{18}\text{N}_2\text{O}_2\text{S} + 1</math>, 327.11 (100.0%), found 327.1.</p> |
|  <p>Methyl (S)-3-(2-(((benzyloxy)carbonyl)amino)-3-phenylpropanethioamido)propanoate (<b>9</b>)</p>      | <p>Pale yellow semisolid purified by silica gel column chromatography using <i>n</i>-hexane:ethyl acetate (3:1 v/v) as eluent; <math>R_f = 0.28</math>. mp 65.2-66.1 °C. <math>^1\text{H-NMR}</math> (500 MHz, <math>\text{CDCl}_3</math>) <math>\delta</math> 8.17 (br. s, 1H), 7.37-7.28 (m, 5H, cbz), 7.25-7.12 (m, 5H), 5.85 (br. s, 1H), 5.05 (m, 2H), 4.63 (m, 1H), 3.87 (dtd, <math>J = 5, 6.6, 6.6, 13.42</math> Hz, 1H), 3.62 (m, 1H), 3.60 (s, 3H), 3.12 (m, 2H), 2.47 (m, 1H), 2.32 (m, 1H). <math>^{13}\text{C-NMR}</math> (126 MHz, <math>\text{CDCl}_3</math>) <math>\delta</math> 202.62, 172.26, 155.89, 136.48, 136.22, 128.32, 128.06, 67.17, 62.85, 52.01, 42.64, 40.48, 31.66. Calculated <math>m/z</math> for <math>\text{C}_{21}\text{H}_{24}\text{N}_2\text{O}_4\text{S} + 1</math>, 401.15 (100.0%), found 401.2.</p>                                                                                   |
|  <p>(S)-1-benzyl-4-methylazetidone-2-thione (<b>10</b>)</p>                                             | <p>Brown liquid purified by silica gel column chromatography using <i>n</i>-hexane:ethyl acetate (3:1 v/v) as eluent; <math>R_f = 0.3</math>. <math>^1\text{H-NMR}</math> (500 MHz, <math>\text{CDCl}_3</math>) <math>\delta</math> 7.30 (m, 5H), 4.94 (d, <math>J = 14.8</math>, 1H), 4.34 (d, <math>J = 14.8</math>, 1H), 4.07 (m, 1H), 3.12 (dd, <math>J = 4.4, 15.6</math> Hz, 1H), 2.66 (dd, <math>J = 3.3, 15.1</math> Hz, 1H), 1.24 (d, <math>J = 6.35</math> Hz, 3H). <math>^{13}\text{C-NMR}</math> (126 MHz, <math>\text{CDCl}_3</math>) <math>\delta</math> 199.98, 134.61, 128.99, 128.70, 128.19, 56.50, 47.64, 47.45, 17.95. Calculated <math>m/z</math> for <math>\text{C}_{11}\text{H}_{13}\text{NS} + 1</math>, 192.08 (100.0%), found HRMS (ESI-TOF) 192.0841.</p>                                                                                                                                            |
|  <p>(S)-(2-(<i>tert</i>-Butyl)-4-thioxo-3,4-dihydropyrimidin-1(2H)-yl)(phenyl)methanone (<b>11</b>)</p> | <p>Pale yellow solid purified by silica gel column chromatography using <i>n</i>-hexane:ethyl acetate (3:1 v/v) as eluent; <math>R_f = 0.23</math>. mp 166.2-166.9 °C. <math>^1\text{H-NMR}</math> (500 MHz, <math>\text{CDCl}_3</math>) <math>\delta</math> 8.53 (br. s, 1H), 7.55-7.43 (m, 5H), 6.92 (d, <math>J = 7.9</math> Hz, 1H), 5.79 (m, 1H), 5.77 (d, <math>J = 7.9</math> Hz, 1H), 1.04 (s, 9H). <math>^{13}\text{C-NMR}</math> (126 MHz, <math>\text{CDCl}_3</math>) <math>\delta</math> 188.74, 169.70, 132.95, 131.73, 131.69, 129.07, 128.14, 112.45, 70.48, 41.52, 25.74. Calculated <math>m/z</math> for <math>\text{C}_{15}\text{H}_{18}\text{N}_2\text{OS} + 1</math>, 275.11 (100.0%), found HRMS (ESI-TOF) 275.1220.</p>                                                                                                                                                                                   |

## NMR spectra



3509  
single\_pulse

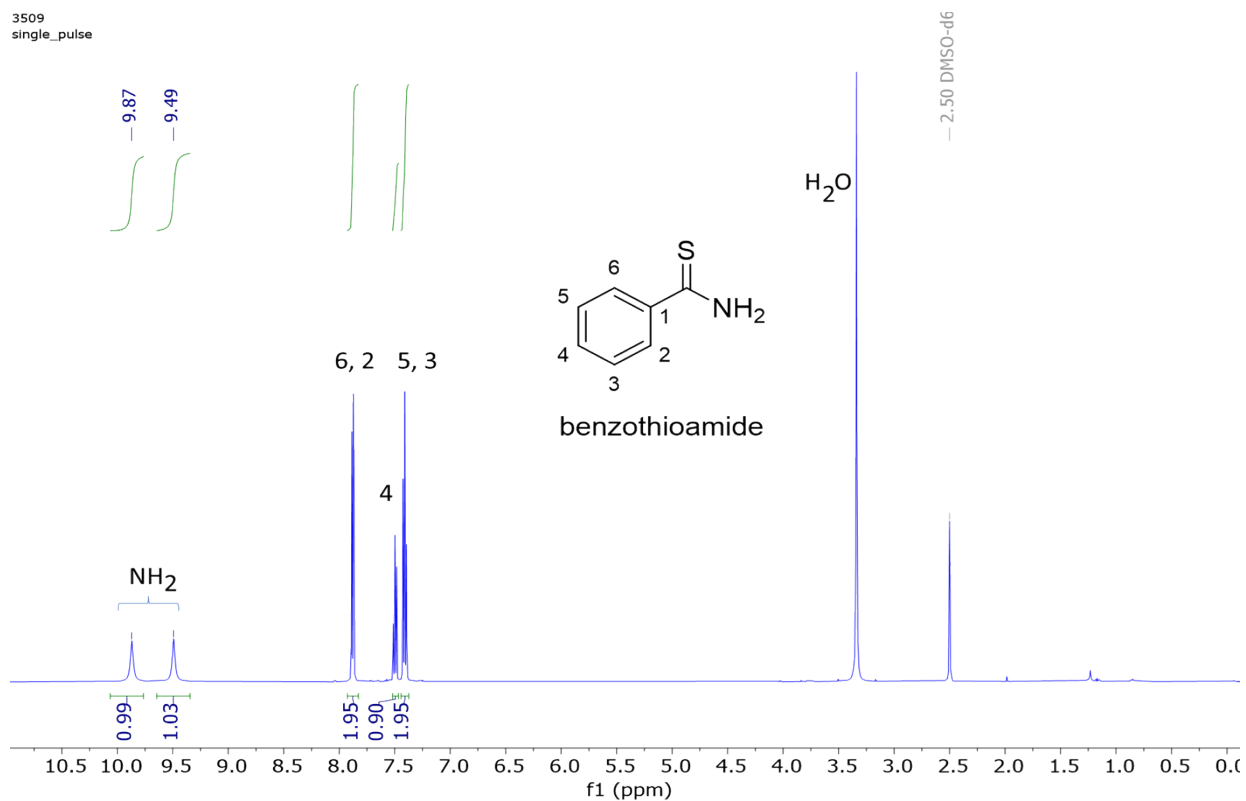

**<sup>1</sup>H-NMR spectrum of benzothioamide (1) (500 MHz, DMSO-*d*<sub>6</sub>).**

3509  
single\_pulse decoupled gated NOE

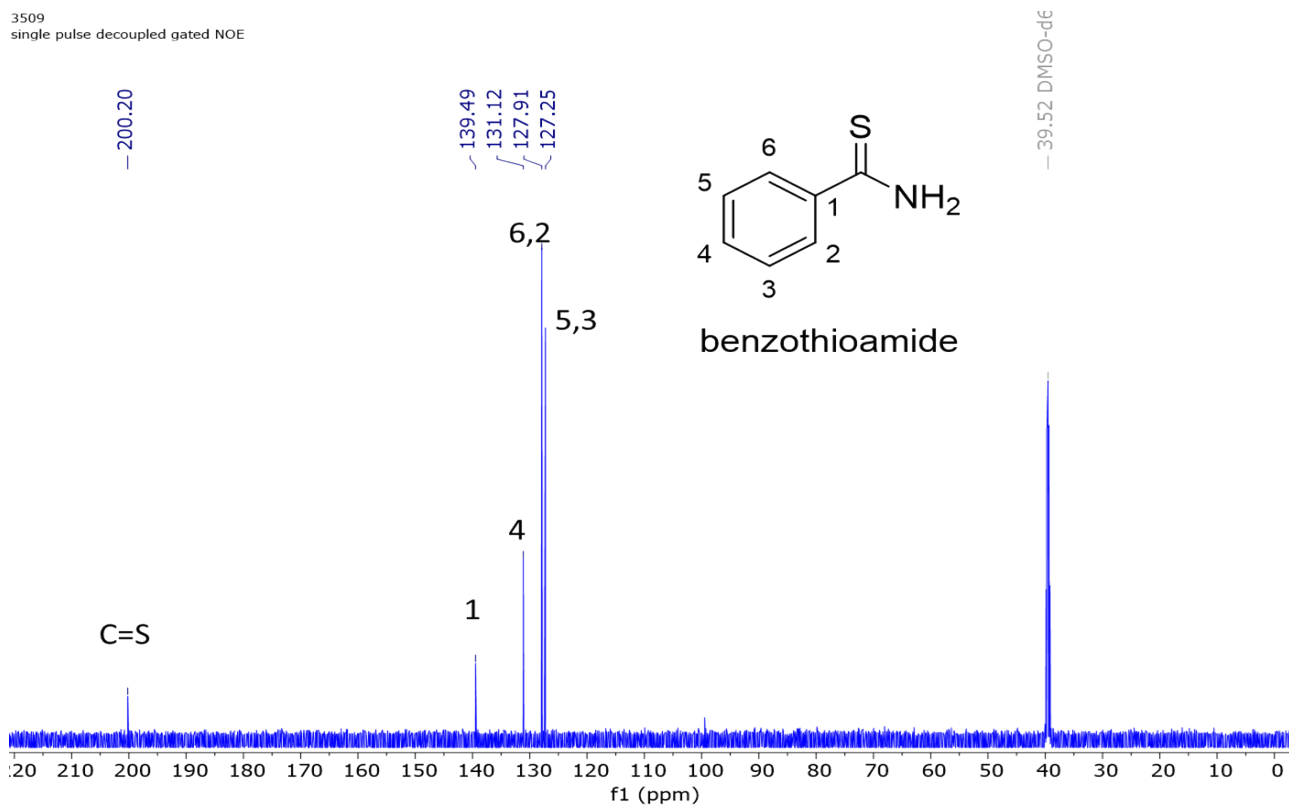

**<sup>13</sup>C NMR spectrum of benzothioamide (1) (126 MHz, DMSO-*d*<sub>6</sub>).**

4676  
single\_pulse

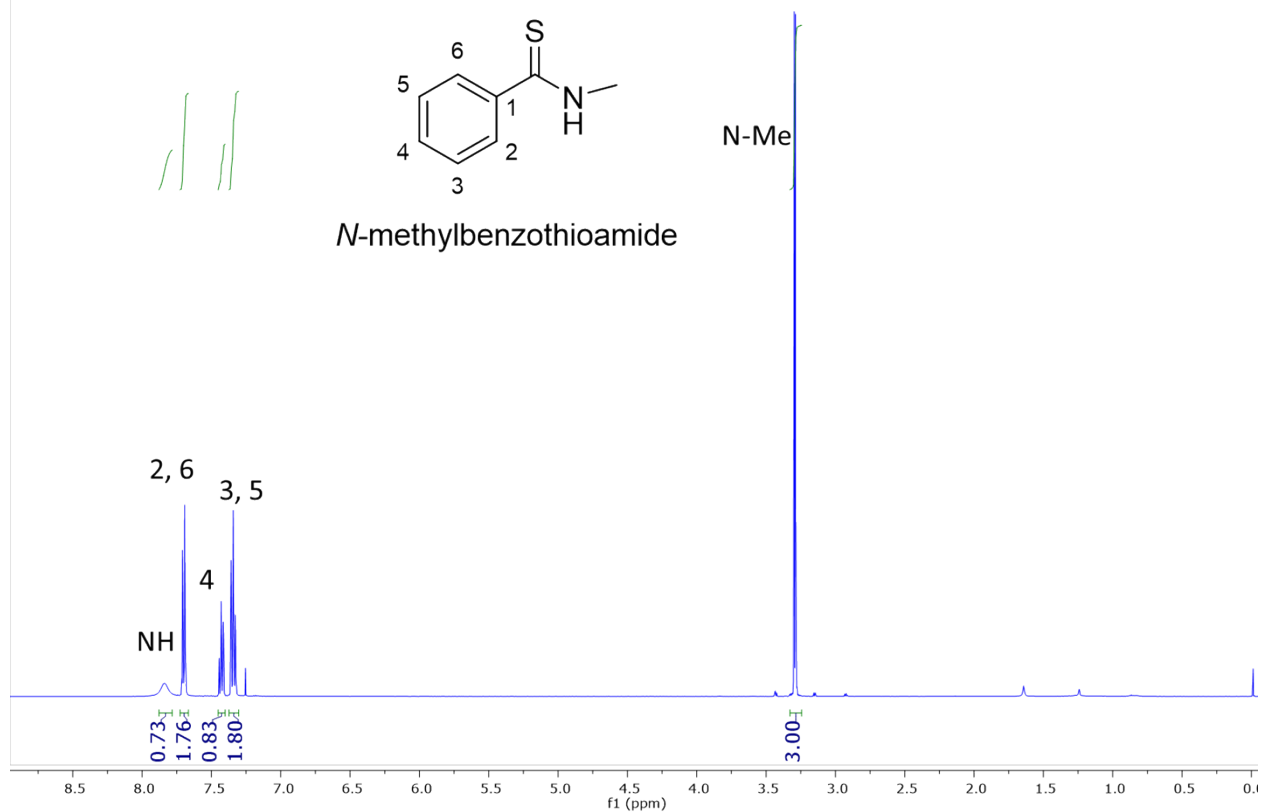

4676  
single pulse decoupled gated NOE

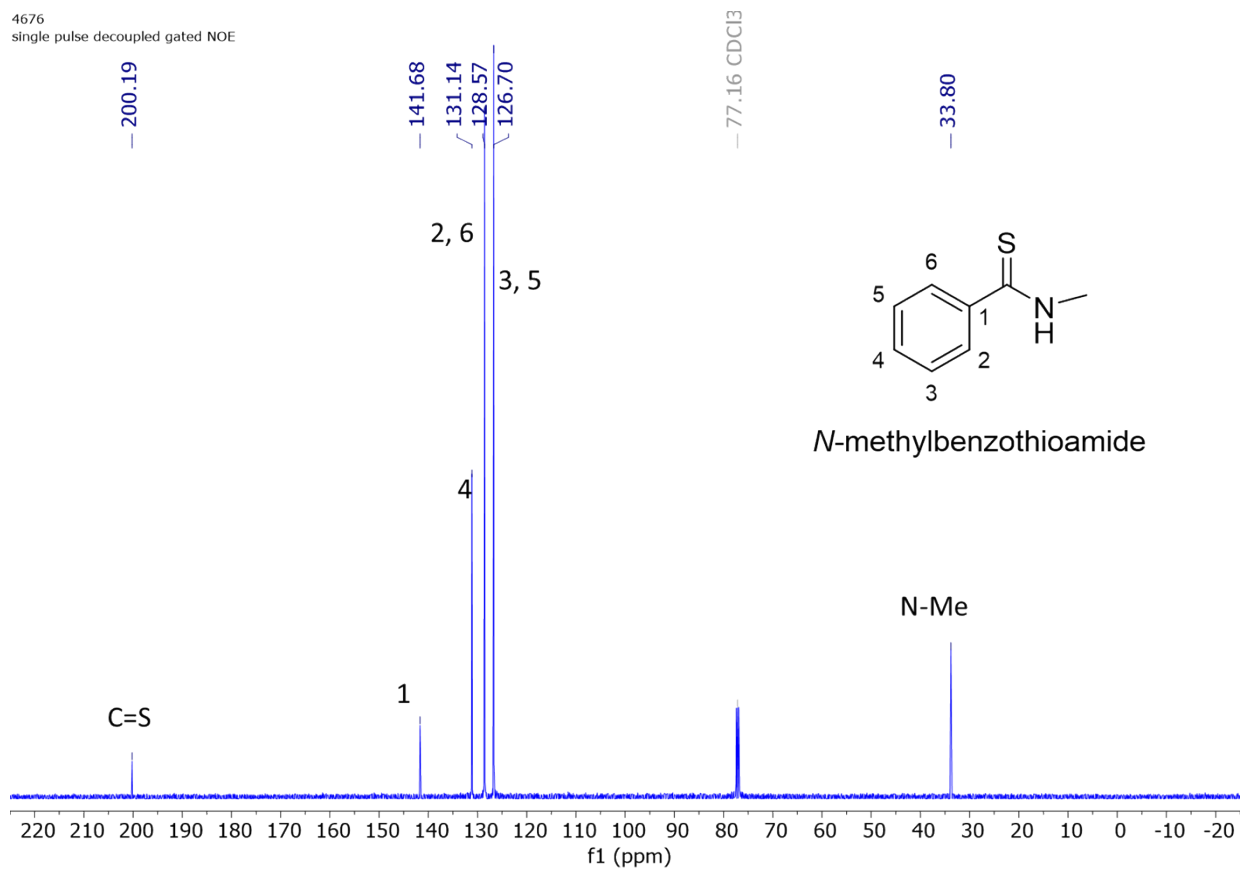

$^{13}\text{C}$ -NMR spectrum of *N*-methylbenzothioamide (**2**) (126 MHz,  $\text{CDCl}_3$ ).

4978  
single\_pulse

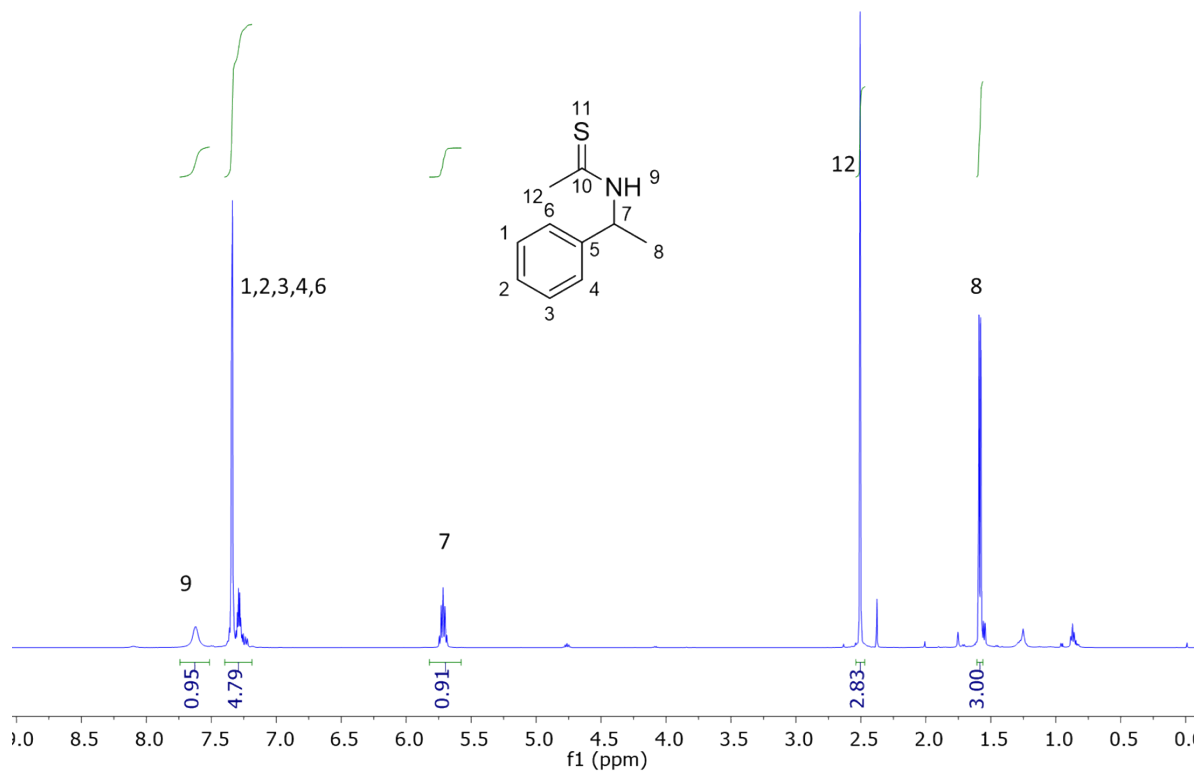

$^1\text{H}$ -NMR spectrum of *N*-(1-phenylethyl)ethanethioamide (**3**) (500 MHz,  $\text{CDCl}_3$ ).

4978  
single pulse decoupled gated NOE

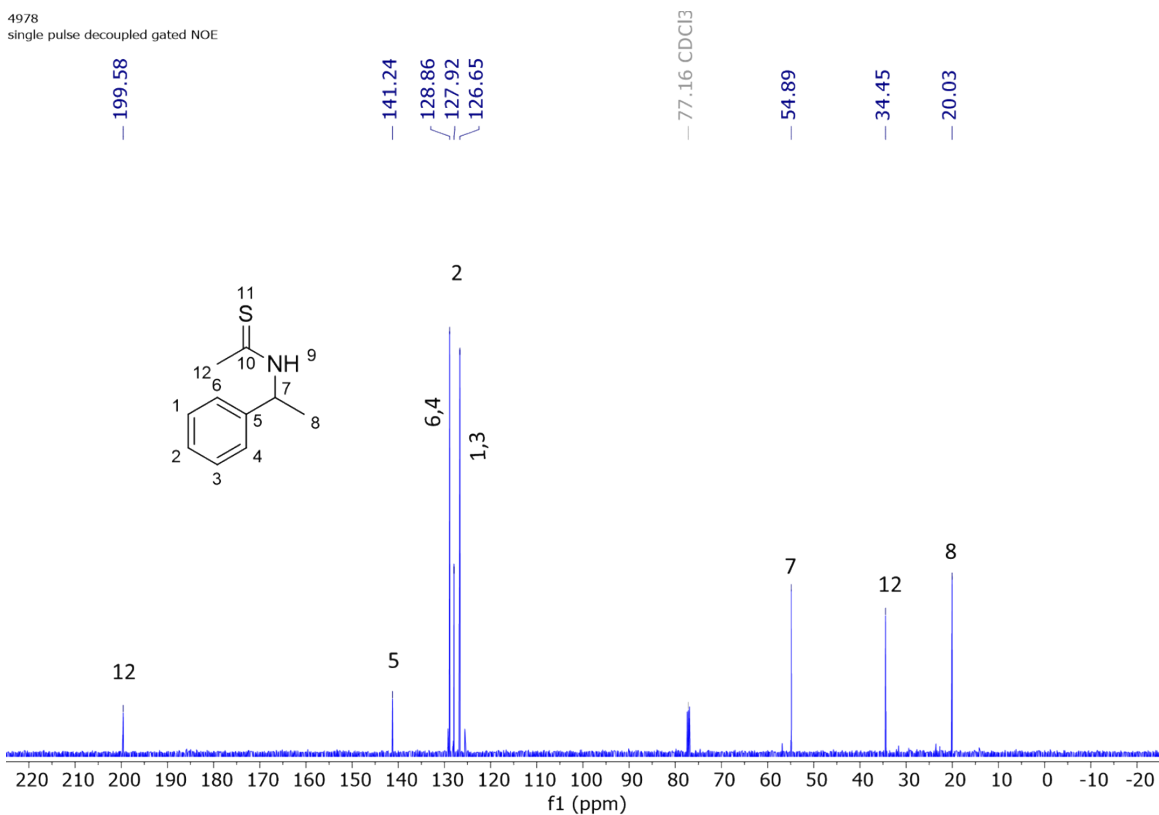

$^{13}\text{C}$ -NMR spectrum of *N*-(1-phenylethyl)ethanethioamide (**3**) (126 MHz,  $\text{CDCl}_3$ ).

4778  
single\_pulse

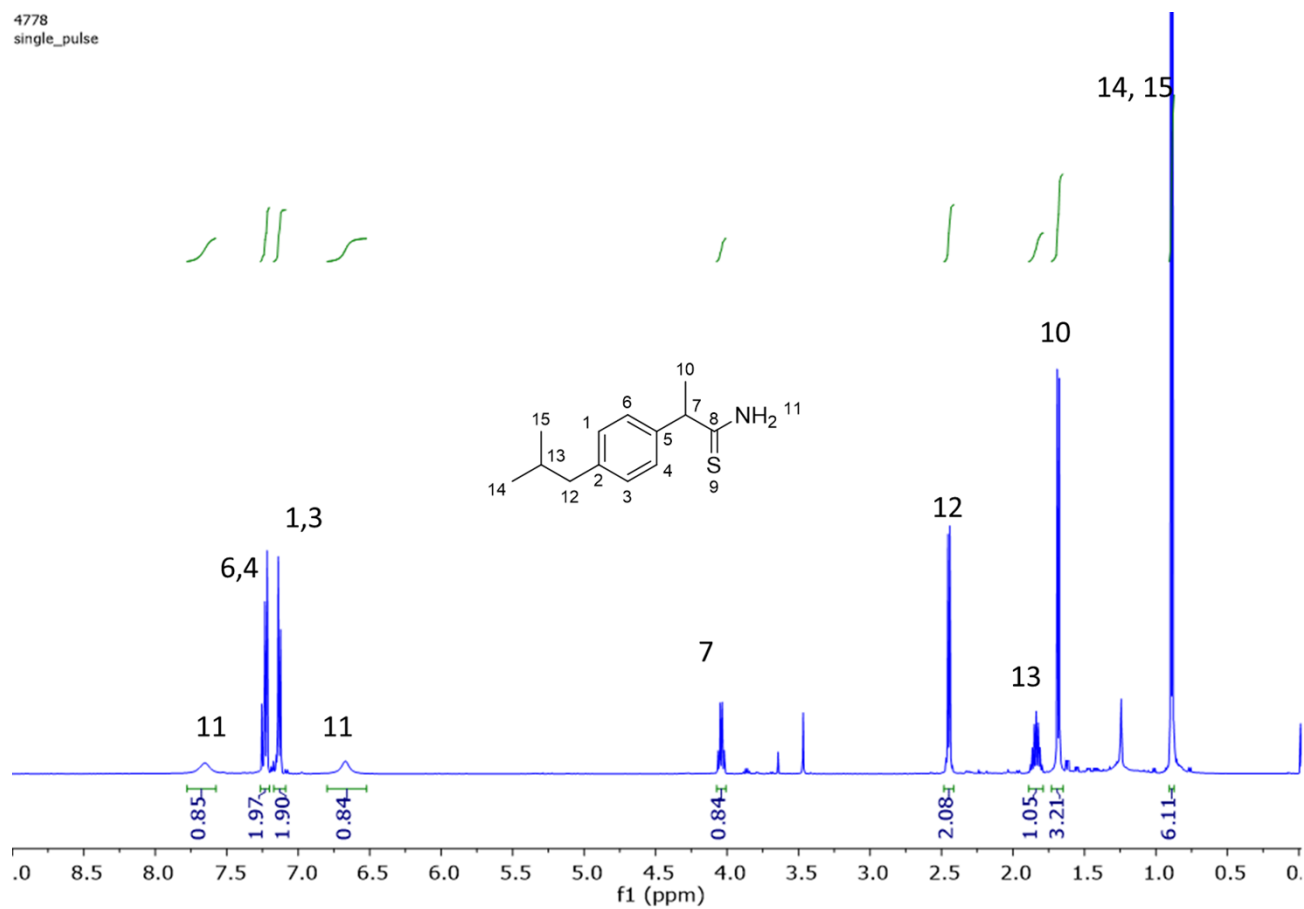

<sup>1</sup>H-NMR spectrum of 2-(4-isobutylphenyl)propanethioamide (**4**) (500 MHz, CDCl<sub>3</sub>).

4778  
single pulse decoupled gated NOE

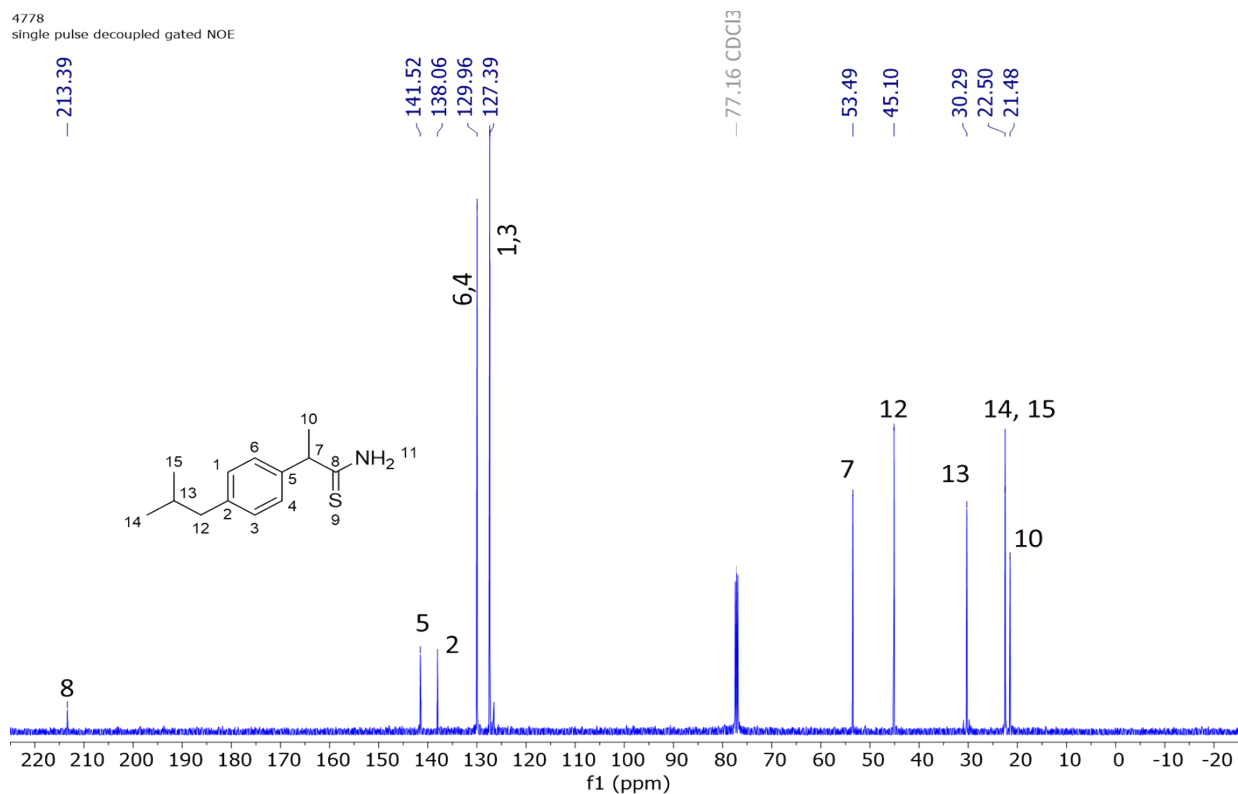

$^{13}\text{C}$ -NMR spectrum of 2-(4-isobutylphenyl)propanethioamide (**4**) (126 MHz,  $\text{CDCl}_3$ ).

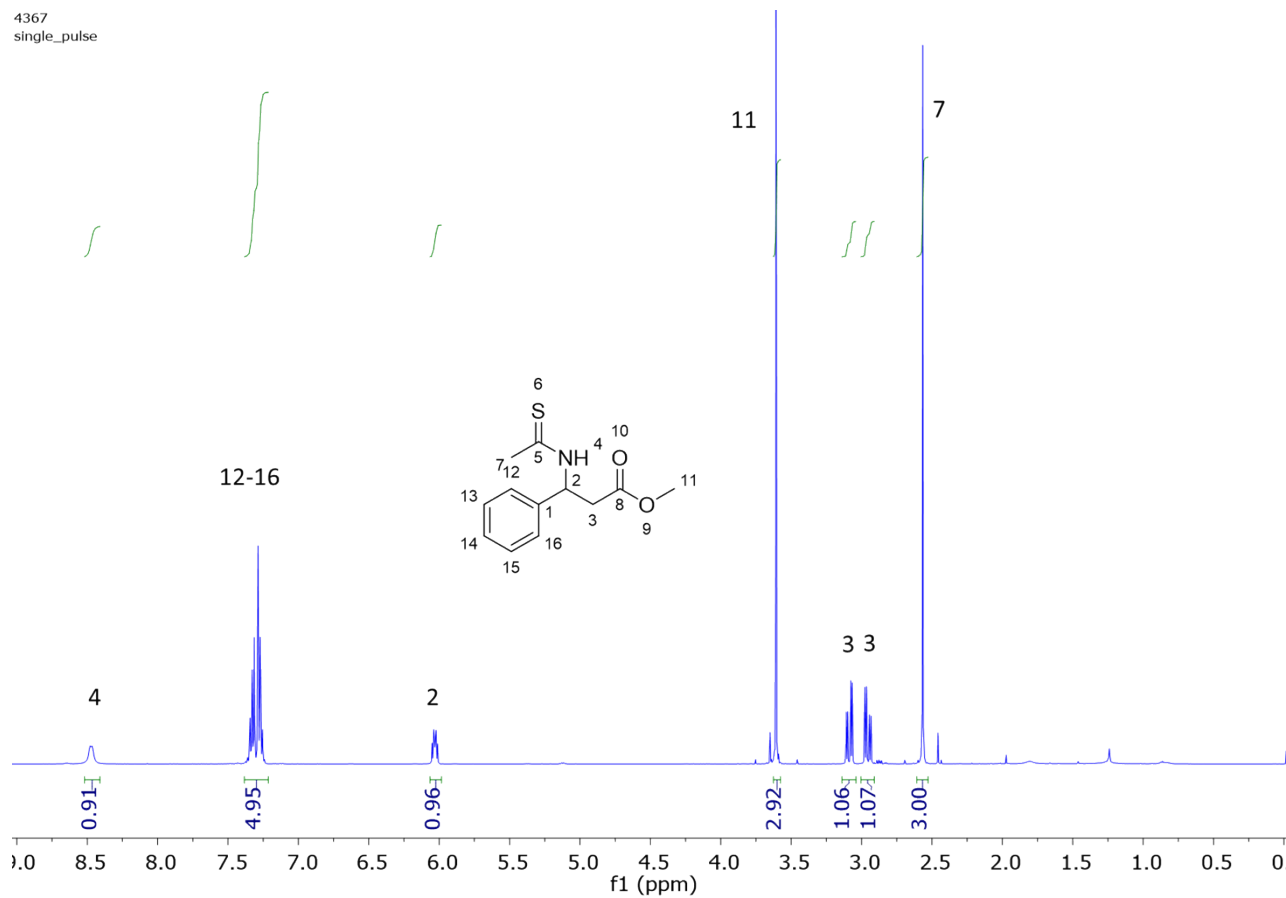

$^1\text{H}$ -NMR spectrum of methyl 3-ethanethioamido-3-phenylpropanoate (**5**) (500 MHz,  $\text{CDCl}_3$ ).

4367  
single pulse decoupled gated NOE

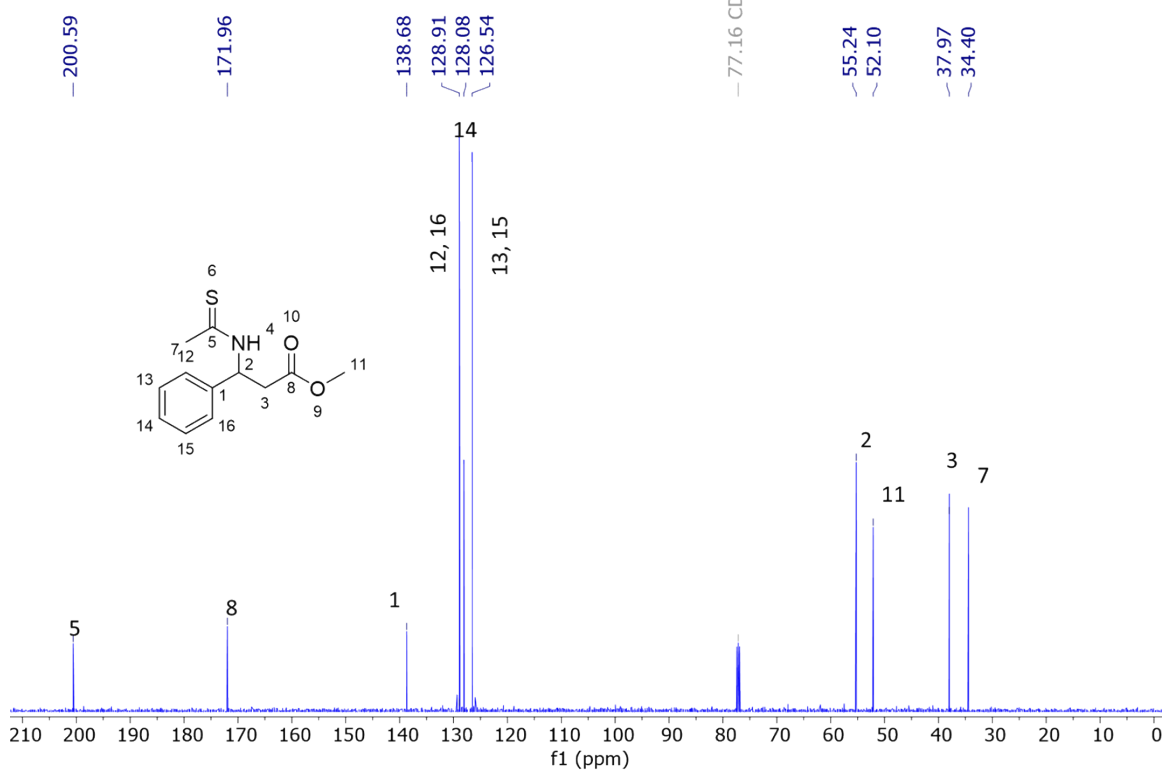

<sup>13</sup>C-NMR spectrum of methyl 3-ethanethioamido-3-phenylpropanoate (**5**) (126 MHz, CDCl<sub>3</sub>).

6634  
single\_pulse

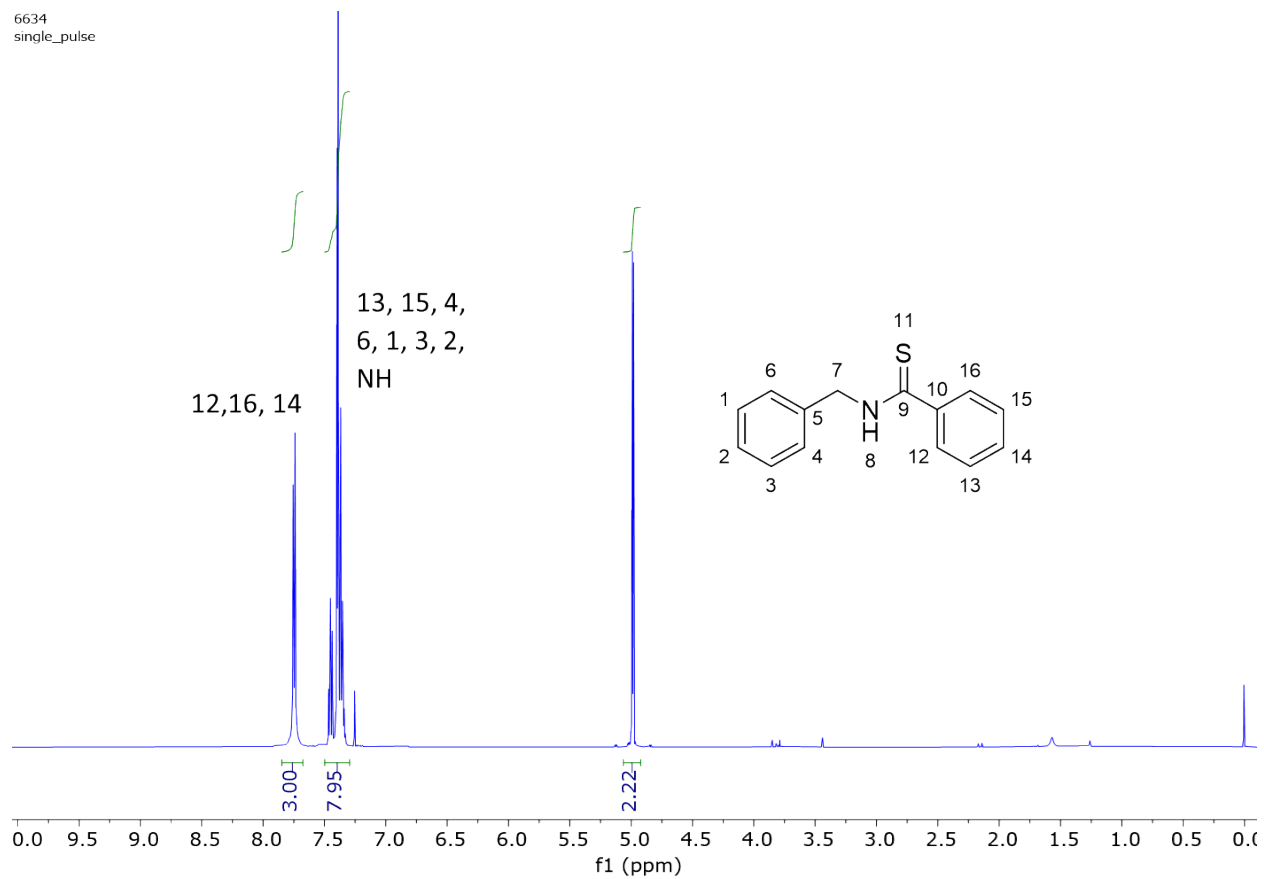

<sup>1</sup>H-NMR spectrum of *N*-benzylbenzothioamide (**6**) (500 MHz, CDCl<sub>3</sub>).

6634  
single pulse decoupled gated NOE

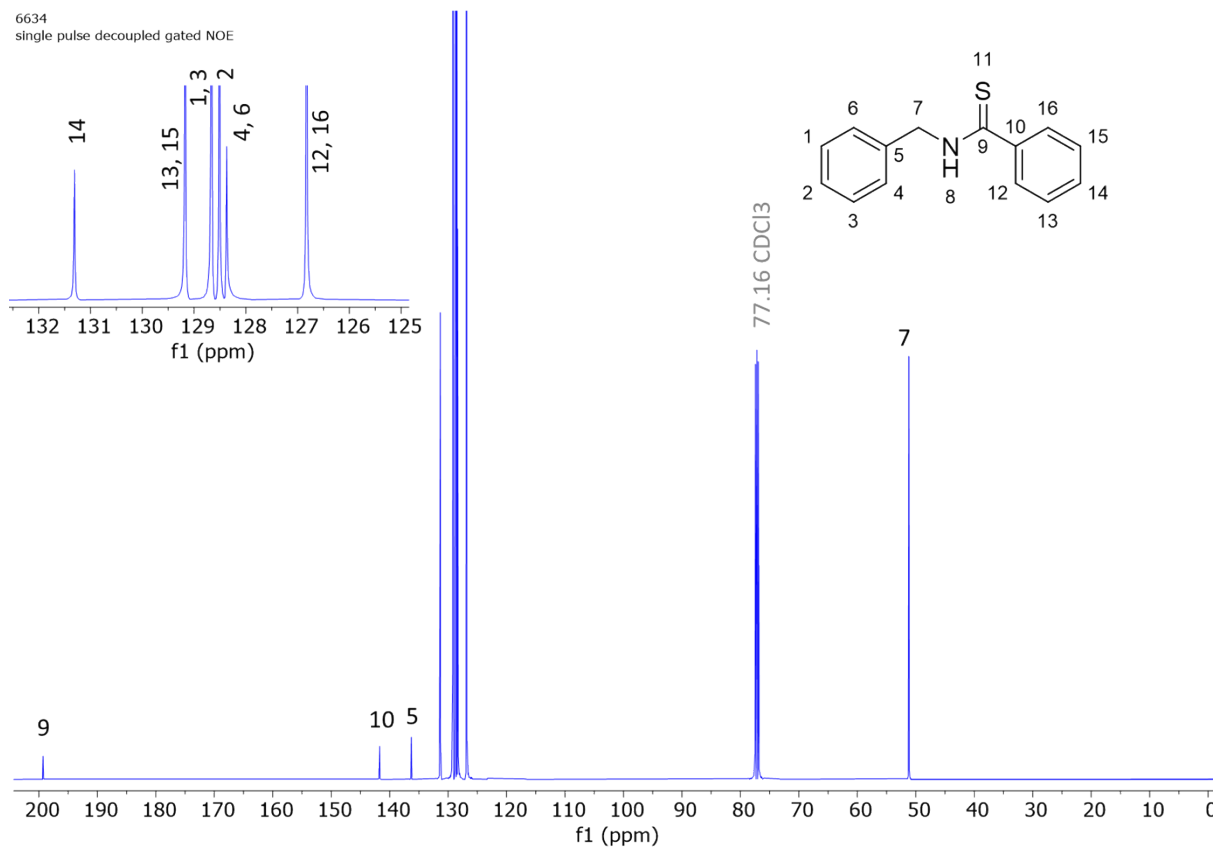

$^{13}\text{C}$ -NMR spectrum of *N*-benzylbenzothioamide (6) (126 MHz,  $\text{CDCl}_3$ ).

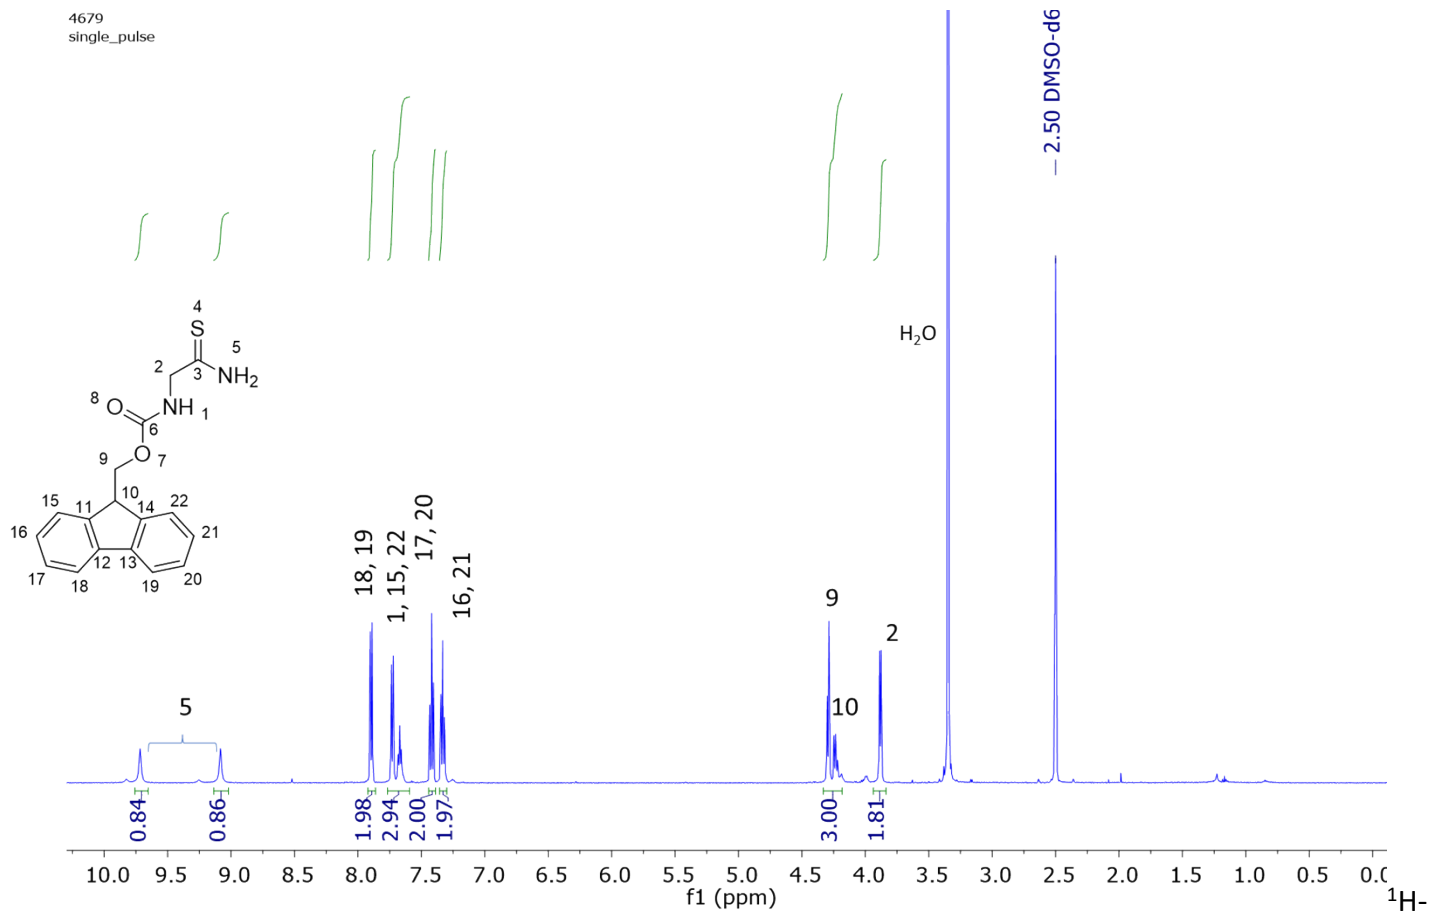

$^1\text{H-NMR}$  spectrum of (9H-fluoren-9-yl)methyl (2-amino-2-thioxoethyl)carbamate (**7**) (500 MHz,  $\text{DMSO-}d_6$ ).

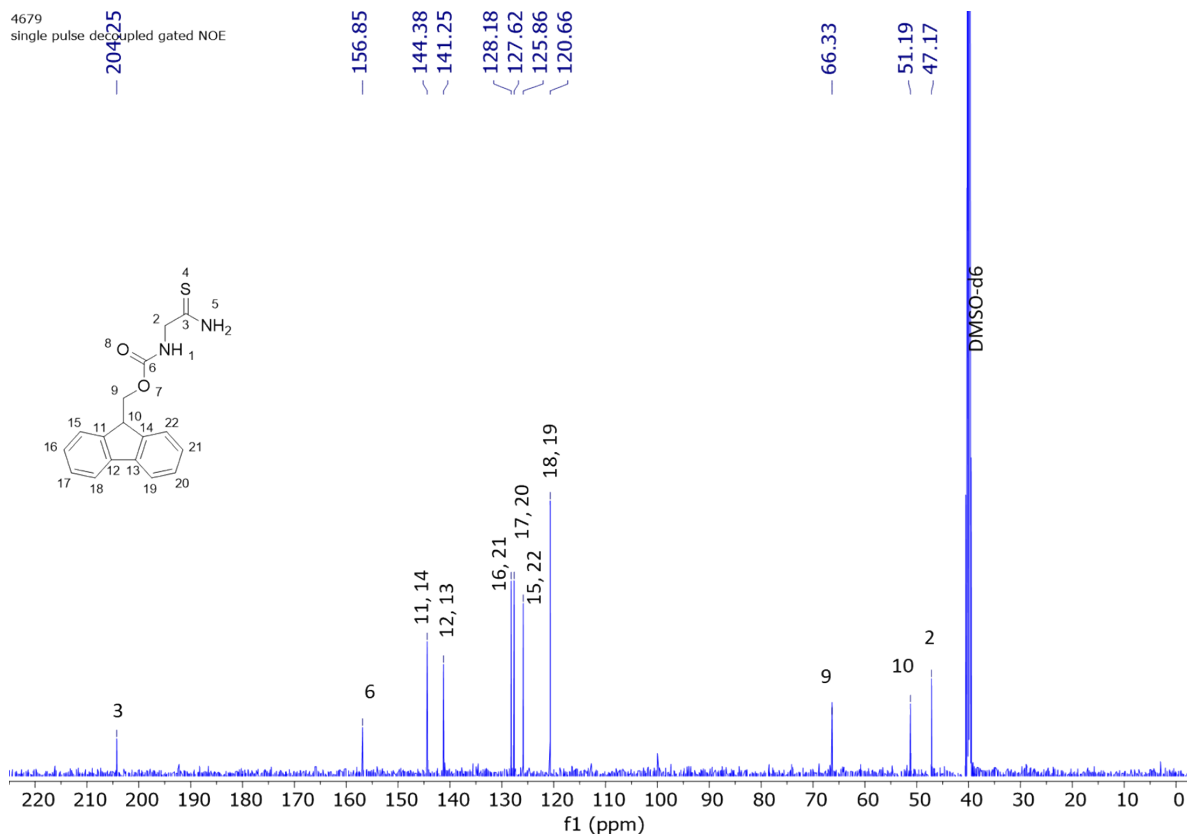

$^{13}\text{C-NMR}$  spectrum of (9H-fluoren-9-yl)methyl (2-amino-2-thioxoethyl)carbamate (**7**) (126 MHz,  $\text{DMSO-}d_6$ ).



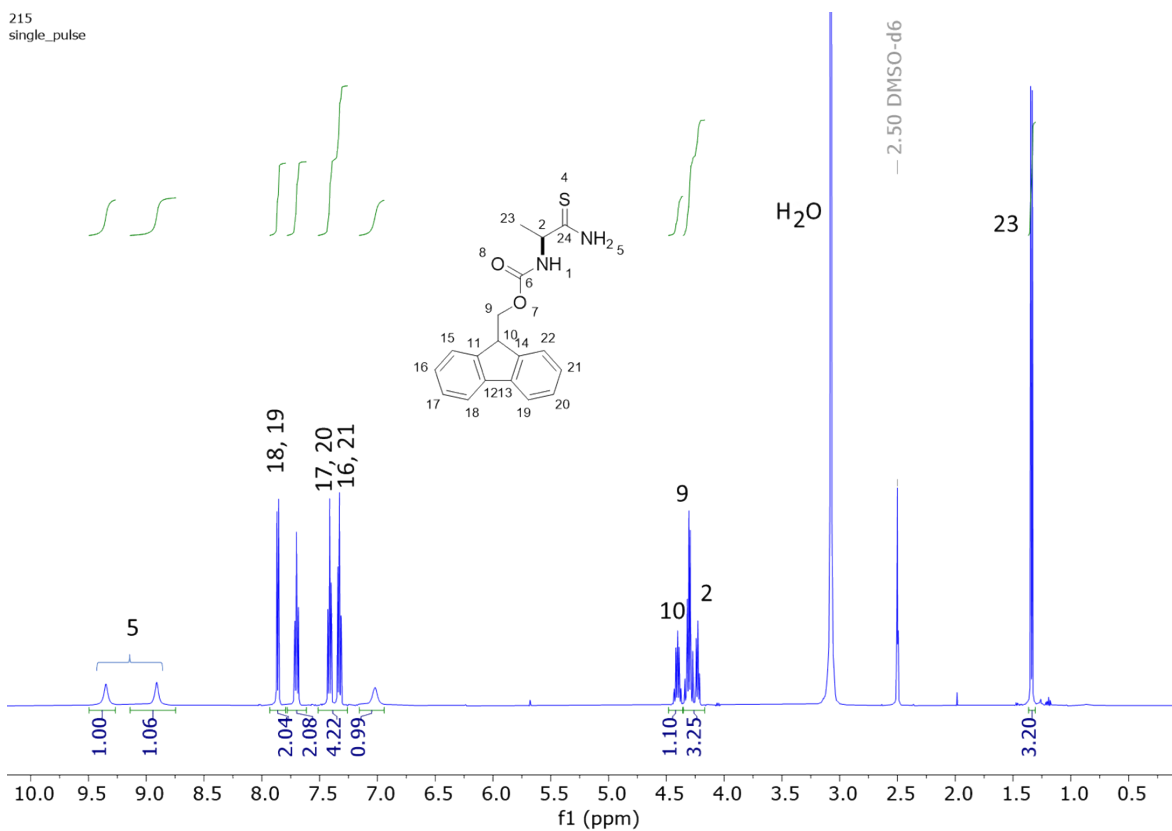

<sup>1</sup>H-NMR spectrum of (9H-fluoren-9-yl)methyl (S)-(1-amino-1-thioxopropan-2-yl)carbamate (**8**) (500 MHz, DMSO-*D*<sub>6</sub>).

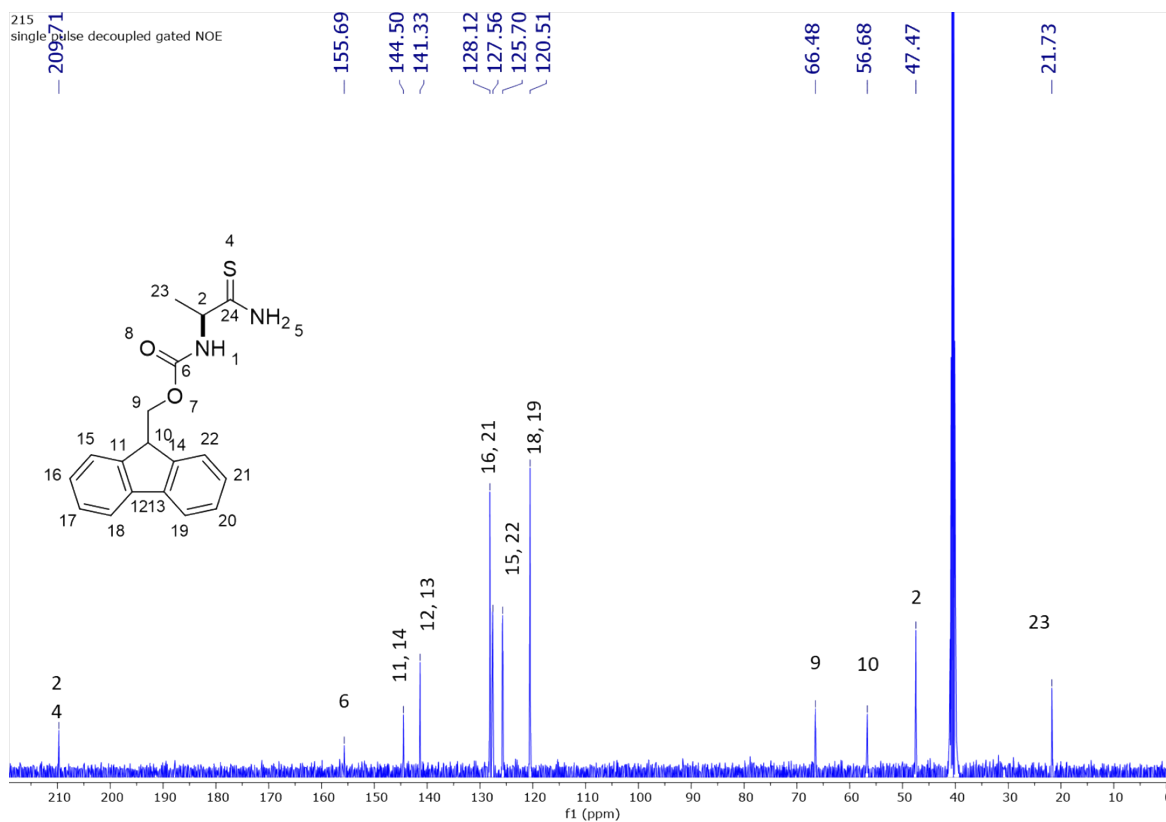

<sup>13</sup>C-NMR spectrum of (9H-fluoren-9-yl)methyl (S)-(1-amino-1-thioxopropan-2-yl)carbamate (**8**) (126 MHz, DMSO-*d*<sub>6</sub>).

5542  
single\_pulse

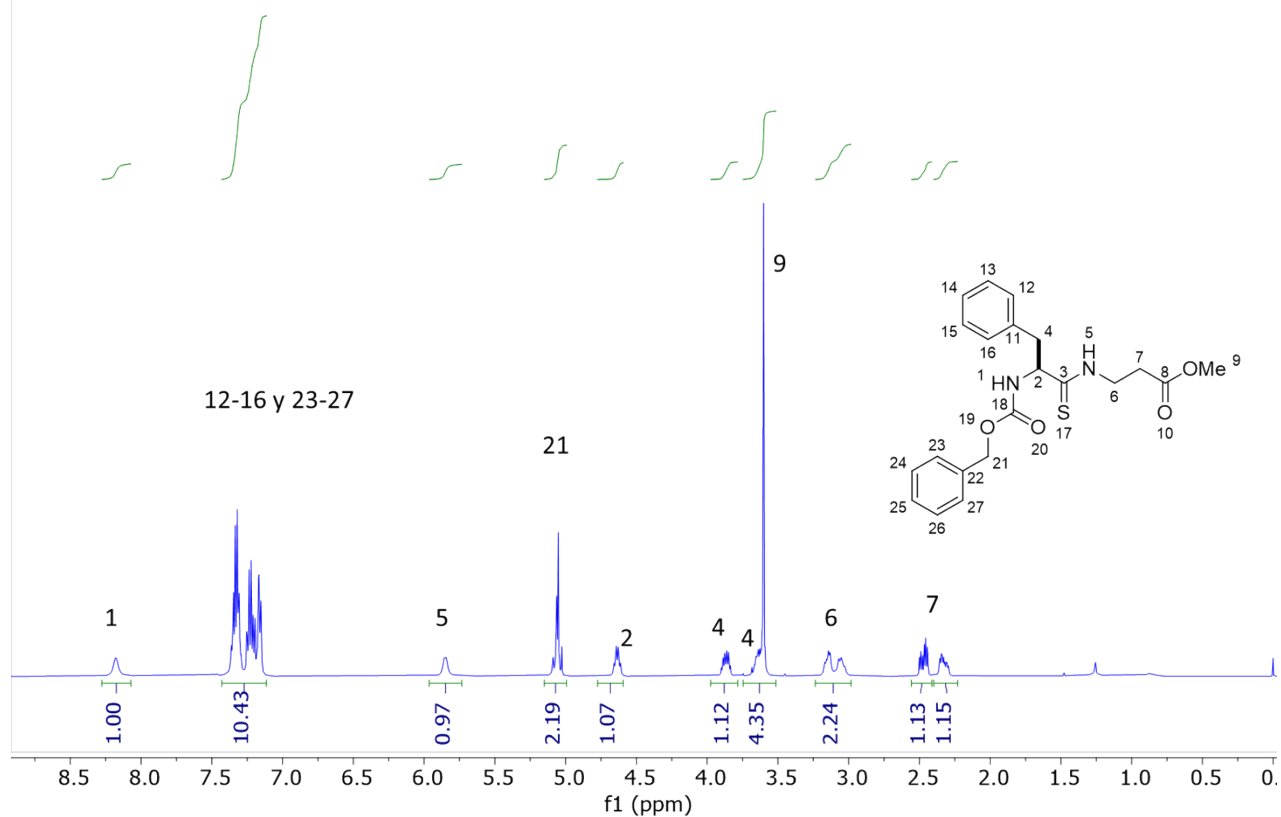

$^1\text{H-NMR}$  spectrum of methyl (S)-3-(2-(((benzyloxy)carbonyl)amino)-3-phenylpropanethioamido)propanoate (**9**) (500 MHz,  $\text{CDCl}_3$ ).

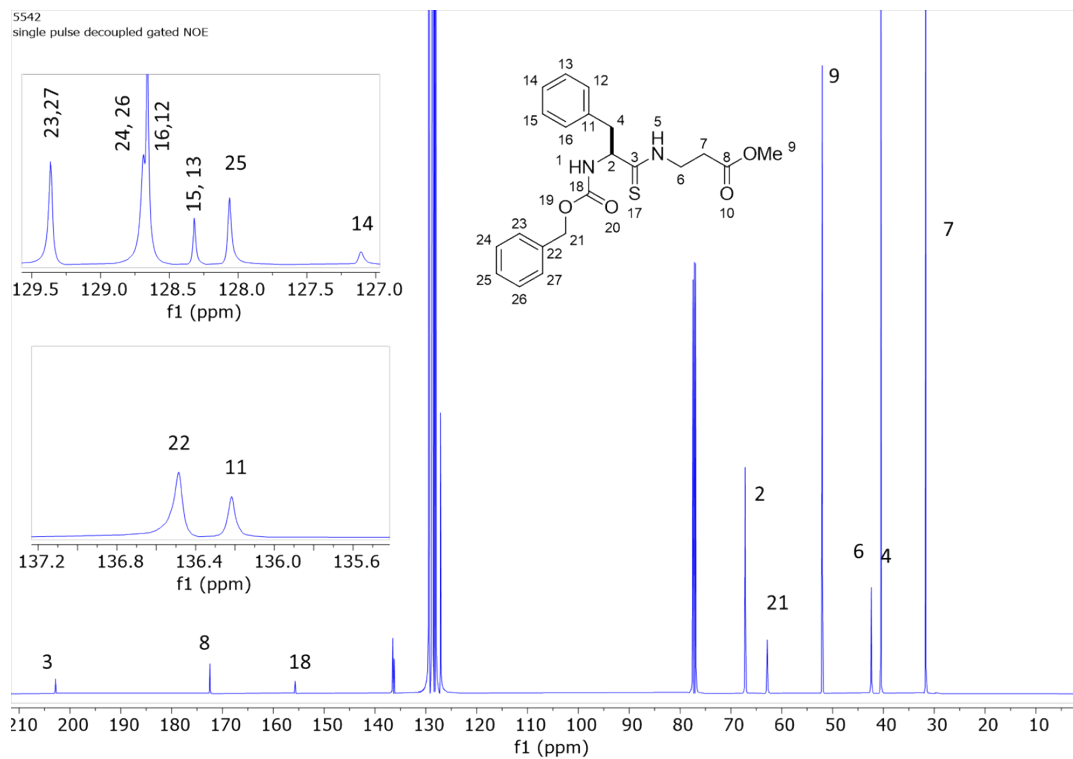

$^{13}\text{C}$ -NMR spectrum of methyl (S)-3-(2-(((benzyloxy)carbonyl)amino)-3-phenylpropanethioamido)propanoate (**9**) (126 MHz,  $\text{CDCl}_3$ ).

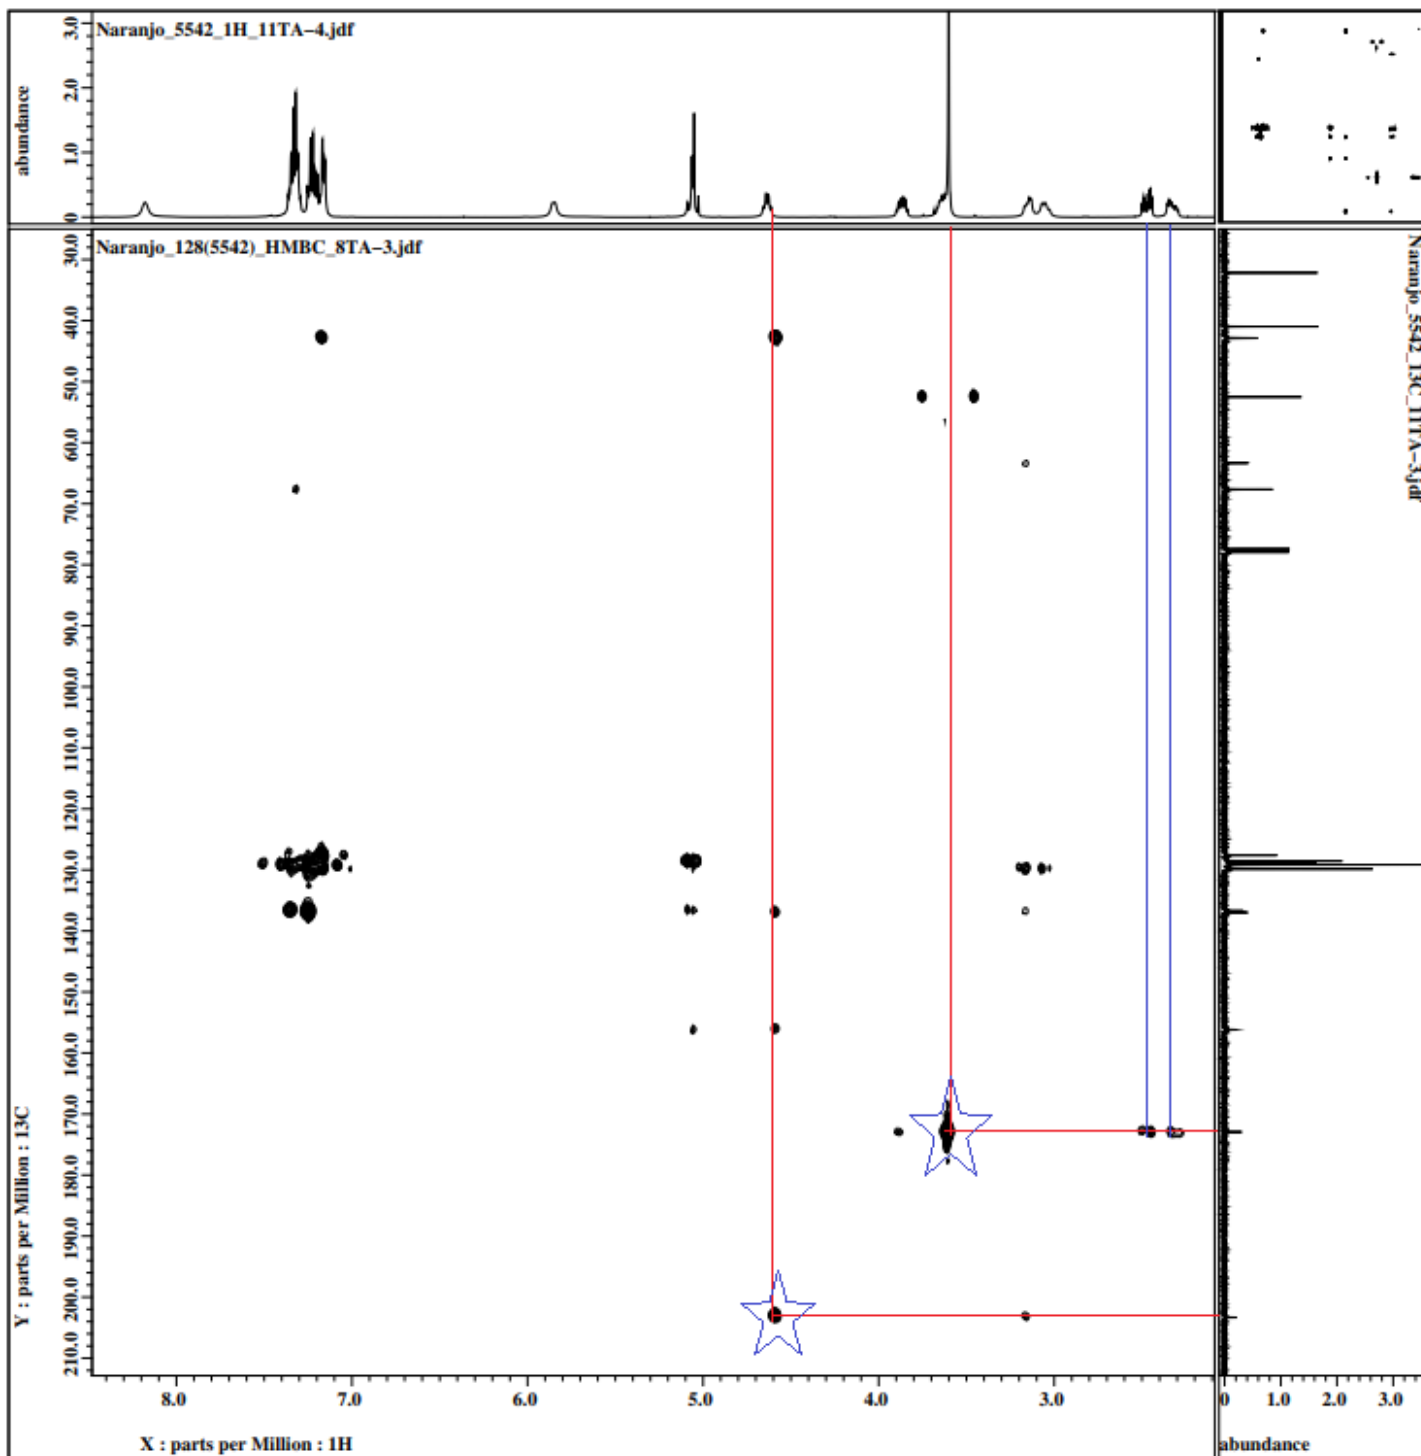

2D NMR-HMBC of methyl (S)-3-(2-(((benzyloxy)carbonyl)amino)-3-phenylpropanethioamido)propanoate (**9**) (500 MHz,  $\text{CDCl}_3$ ).

4670  
single\_pulse

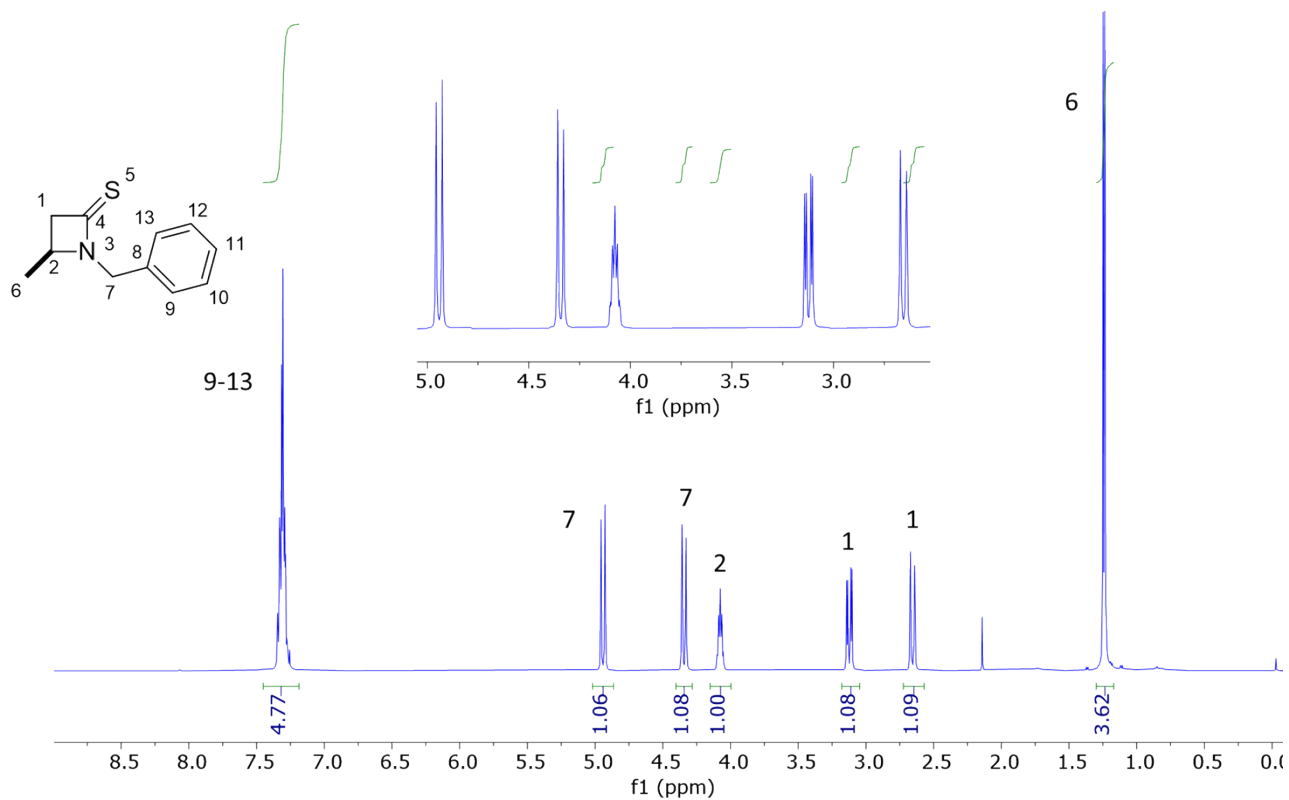

<sup>1</sup>H-NMR spectrum of (S)-1-benzyl-4-methylazetidione (**10**) (500 MHz, CDCl<sub>3</sub>).

4670  
single pulse decoupled gated NOE

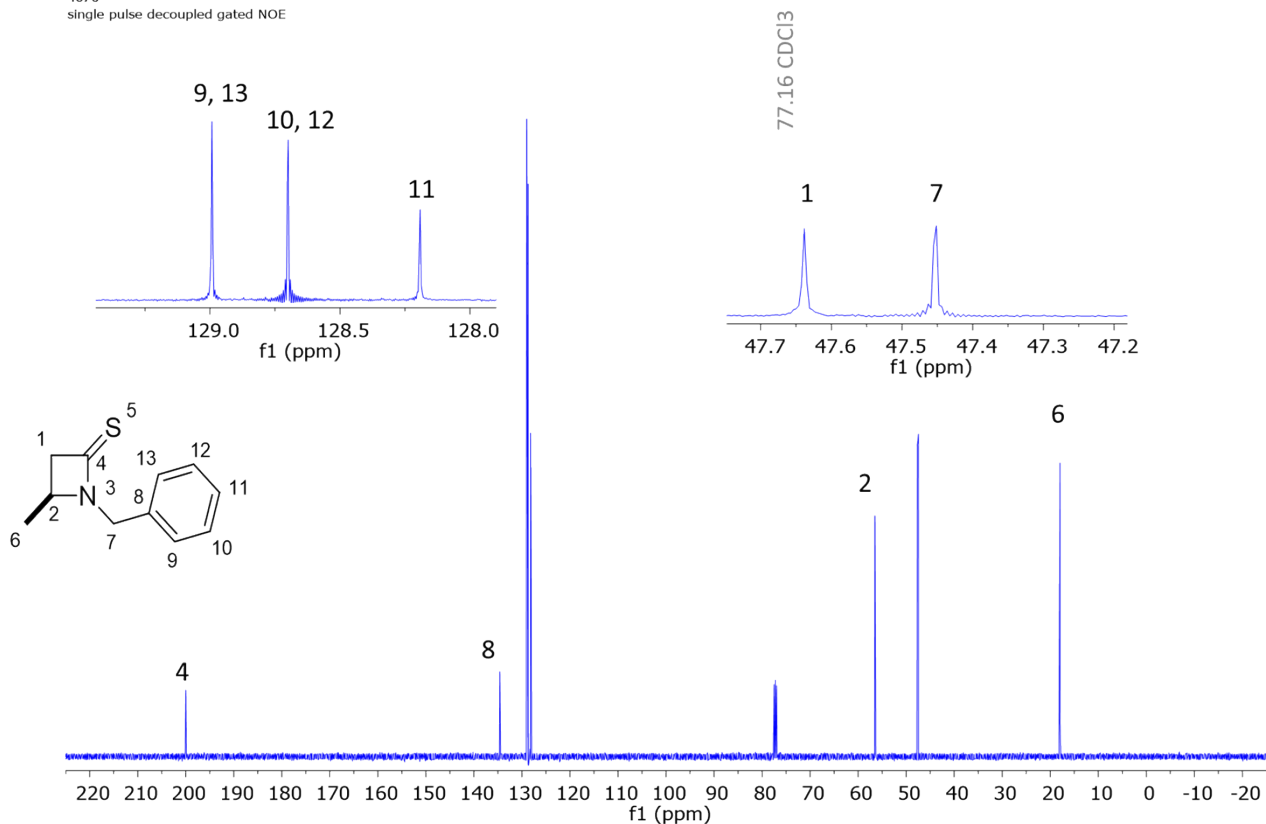

<sup>13</sup>C-NMR spectrum of (S)-1-benzyl-4-methylazetidione (**10**) (126 MHz, CDCl<sub>3</sub>).

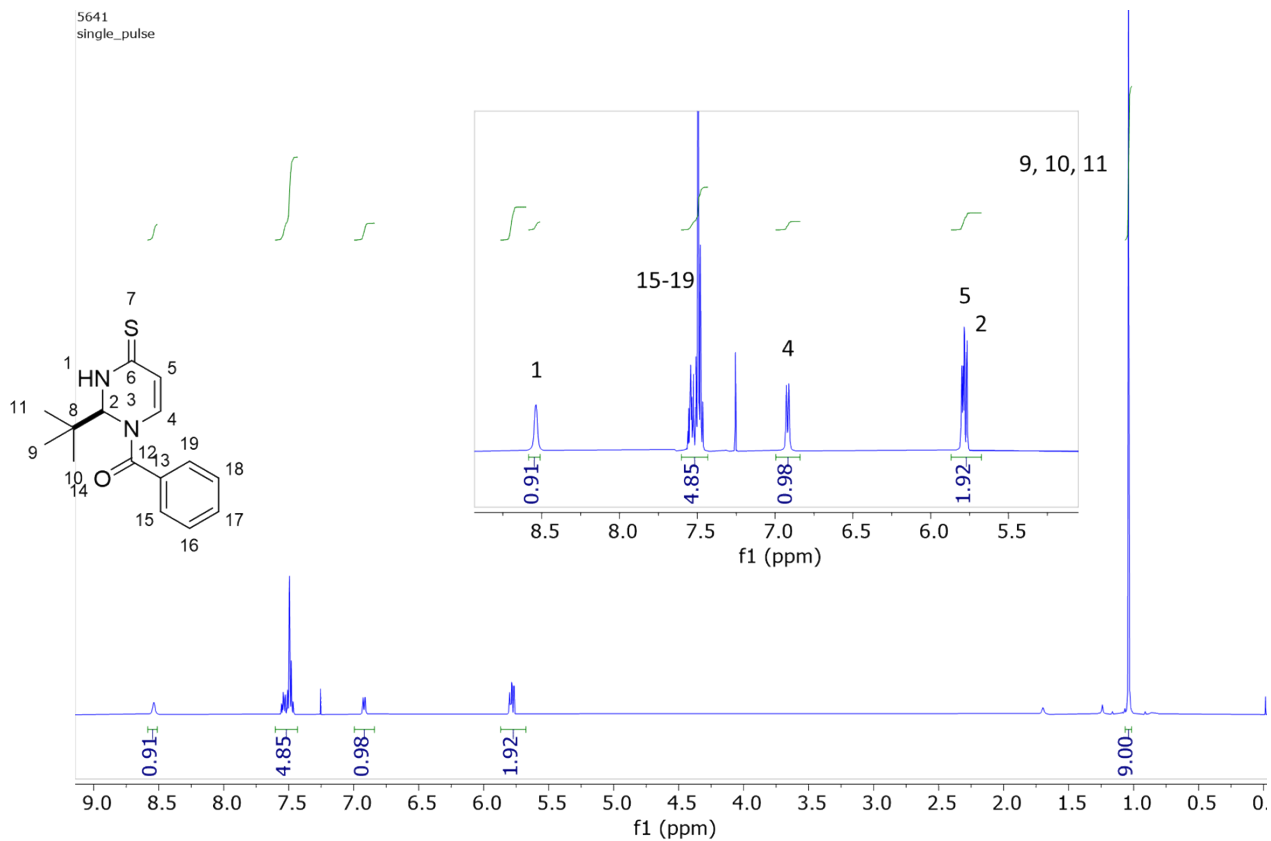

$^1\text{H-NMR}$  spectrum of *(S)*-2-(*tert*-butyl)-4-thioxo-3,4-dihydropyrimidin-1(2H)-yl(phenyl)methanone (**11**) (500 MHz,  $\text{CDCl}_3$ ).

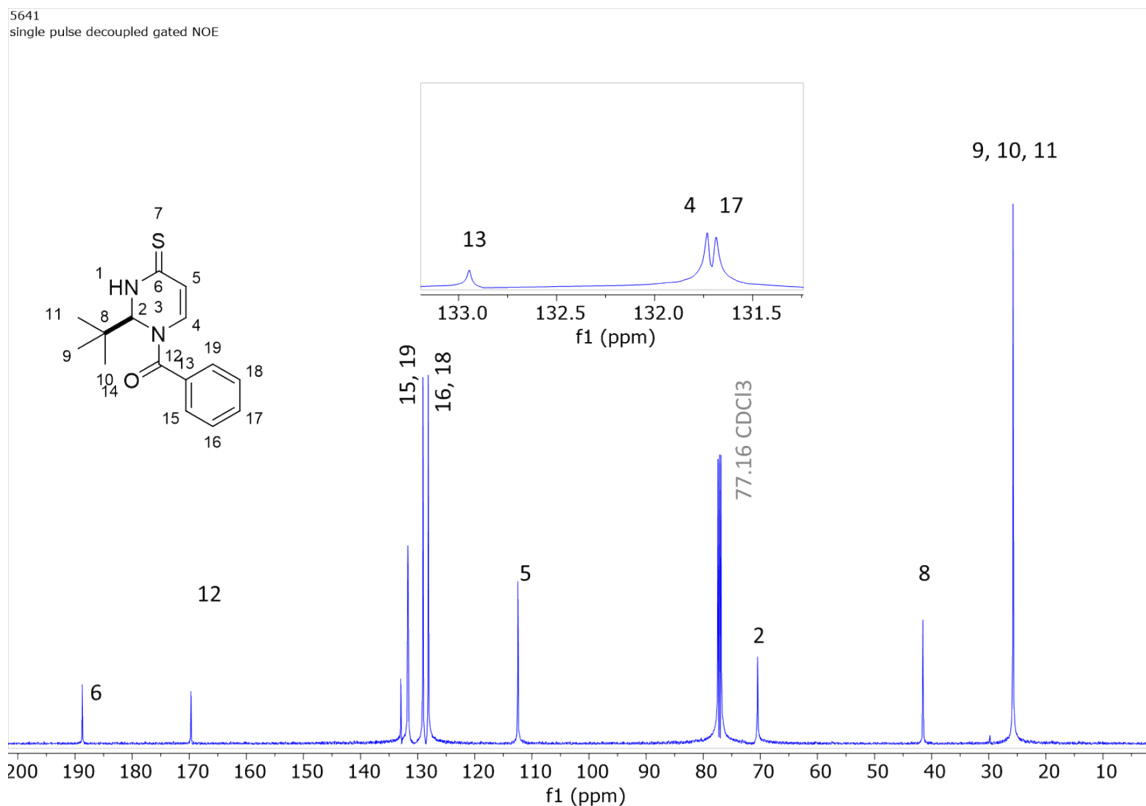

$^{13}\text{C-NMR}$  spectrum of *(S)*-2-(*tert*-butyl)-4-thioxo-3,4-dihydropyrimidin-1(2H)-yl(phenyl)methanone (**11**) (126 MHz,  $\text{CDCl}_3$ ).

## Mass spectra

Data:U-169 10TA  
 Sample Name:Dr. Miranda / Diego Aleman  
 Description:  
 Ionization Mode:ESI+  
 History:Determine m/z[Peak Detect[Centroid,30,Area];Correct Base[];Smooth[5]];Correct Base[5.0%];Average(MS[...

Acquired:2/9/2024 12:04:42 PM  
 Operator:AccuTOF  
 Mass Calibration data:Cal\_PEG\_600  
 Created:2/9/2024 12:31:55 PM  
 Created by:AccuTOF

Charge number:1 Tolerance:3.00(ppm), 5.00 .. 15.00(mmu) Unsaturation Number:-1.0 .. 20.0 (Fraction:Both)  
 Element:<sup>12</sup>C:0 .. 11, <sup>1</sup>H:0 .. 14, <sup>14</sup>N:0 .. 1, <sup>32</sup>S:0 .. 1

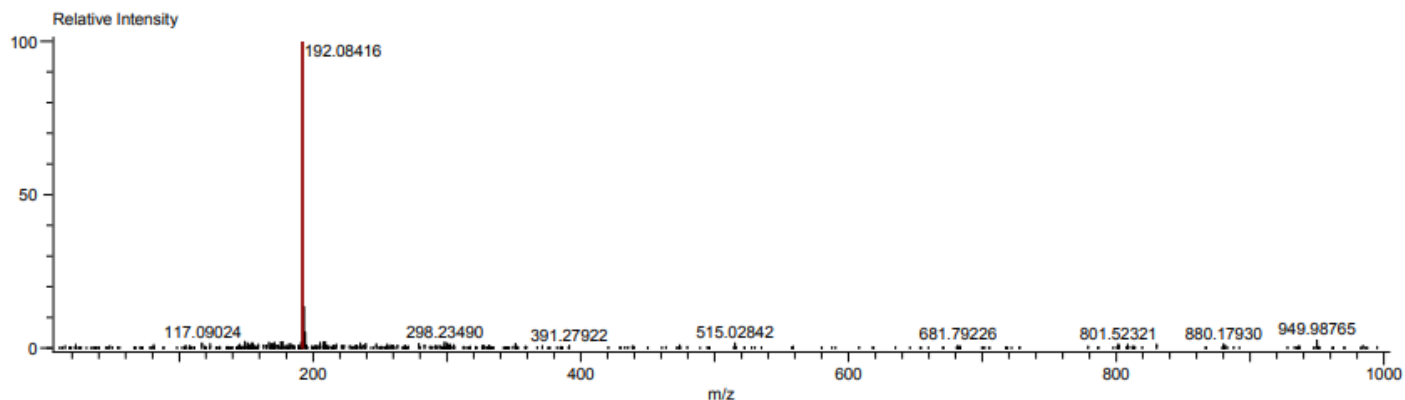

| Mass      | Intensity | Calc. Mass | Mass Difference (mmu) | Mass Difference (ppm) | Possible Formula                                                                                                     | Unsaturation Number |
|-----------|-----------|------------|-----------------------|-----------------------|----------------------------------------------------------------------------------------------------------------------|---------------------|
| 192.08416 | 13900.24  | 192.08469  | -0.54                 | -2.79                 | <sup>12</sup> C <sub>11</sub> <sup>1</sup> H <sub>14</sub> <sup>14</sup> N <sub>1</sub> <sup>32</sup> S <sub>1</sub> | 6.5                 |

### HRMS (ESI-TOF) of (S)-1-benzyl-4-methylazetidione-2-thione (**10**)

Data:U-170 11TA  
 Sample Name:Dr. Miranda / Diego Aleman  
 Description:  
 Ionization Mode:ESI+  
 History:Determine m/z[Peak Detect[Centroid,30,Area];Correct Base[];Smooth[5]];Correct Base[5.0%];Average(MS[...

Acquired:2/9/2024 12:09:13 PM  
 Operator:AccuTOF  
 Mass Calibration data:CaI\_PEG\_600  
 Created:2/9/2024 12:38:07 PM  
 Created by:AccuTOF

Charge number:1 Tolerance:3.00(ppm), 5.00 .. 15.00(mmu) Unsaturation Number:-1.0 .. 20.0 (Fraction:Both)  
 Element:<sup>12</sup>C:0 .. 15, <sup>1</sup>H:0 .. 19, <sup>14</sup>N:0 .. 2, <sup>16</sup>O:0 .. 1, <sup>32</sup>S:0 .. 1

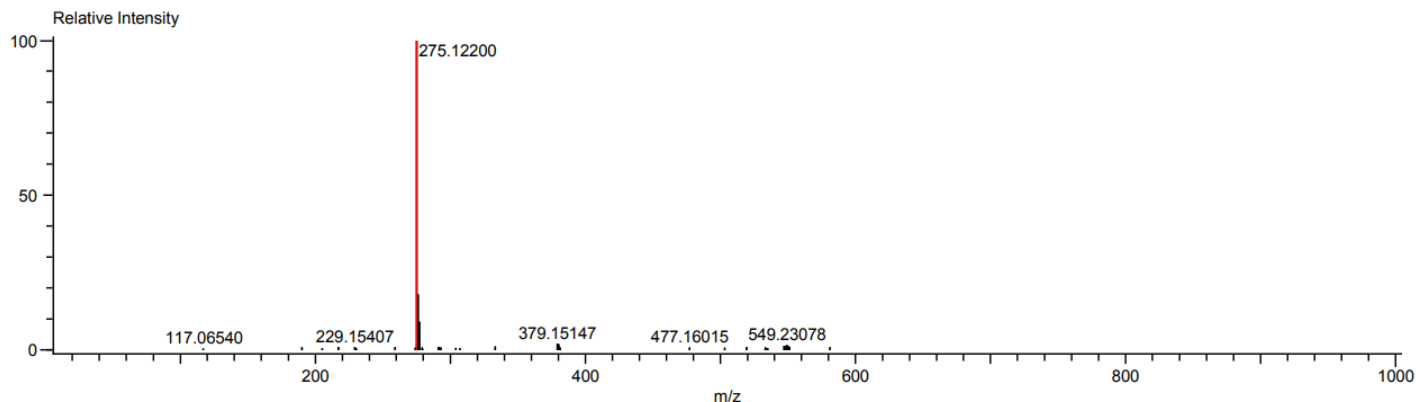

| Mass      | Intensity | Calc. Mass | Mass Difference (mmu) | Mass Difference (ppm) | Possible Formula                                                                                                                                  | Unsaturation Number |
|-----------|-----------|------------|-----------------------|-----------------------|---------------------------------------------------------------------------------------------------------------------------------------------------|---------------------|
| 275.12200 | 305769.57 | 275.12181  | 0.19                  | 0.70                  | <sup>12</sup> C <sub>15</sub> <sup>1</sup> H <sub>19</sub> <sup>14</sup> N <sub>2</sub> <sup>16</sup> O <sub>1</sub> <sup>32</sup> S <sub>1</sub> | 8.5                 |

### HRMS (ESI-TOF) of (S)-(2-(tert-butyl)-4-thioxo-3,4-dihydropyrimidin-1(2H)-yl)(phenyl)methanone (**11**)

## HPLC Chromatograms

Studies for Determining Racemization of 6g (9H-fluoren-9-yl)methyl-(1-amino-1-thioxopropan-2-yl)carbamate  
(8)

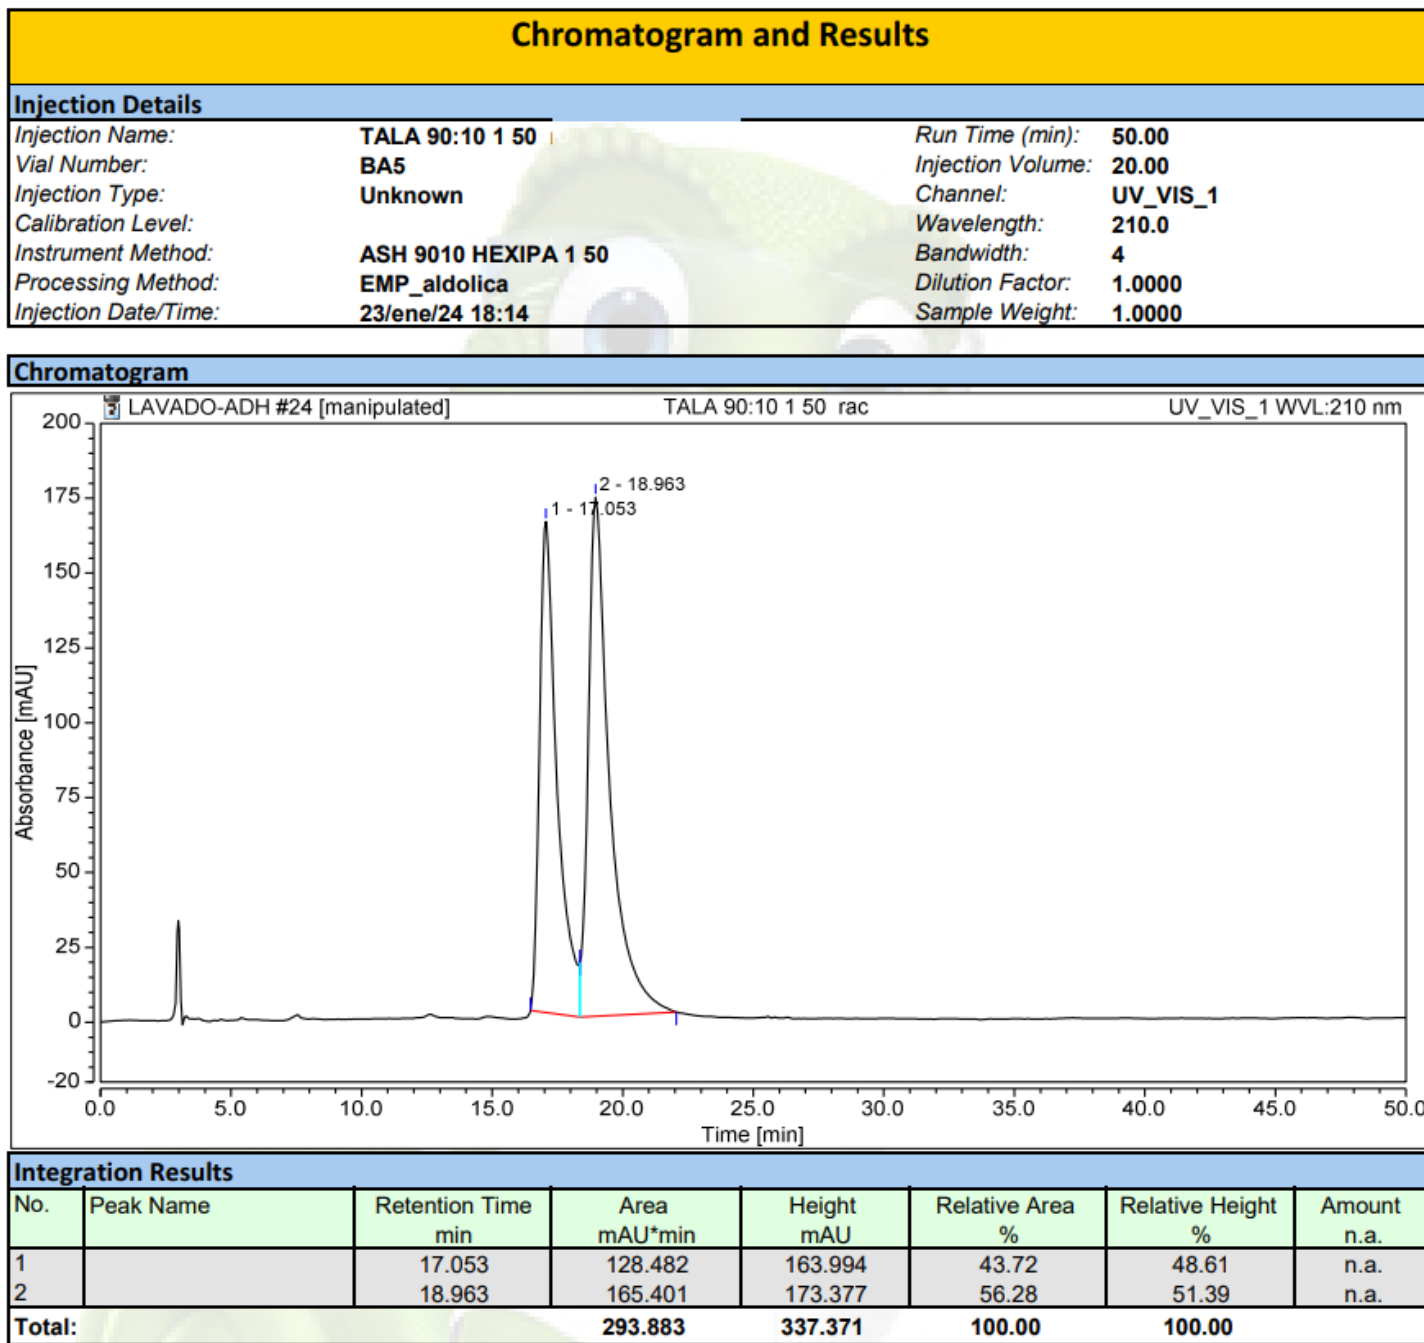

Racemic HPLC condition: Chiralpak® AS-H 150 x 2.1 mm column; hexanes (solvent A): isopropanol (solvent B); isocratic 10% solvent B in 50 min; flow rate = 1.0 mL/min; detection wavelength = 210 nm

## Chromatogram and Results

### Injection Details

|                      |                      |                   |          |
|----------------------|----------------------|-------------------|----------|
| Injection Name:      | TALA 90:10 1 50      | Run Time (min):   | 50.00    |
| Vial Number:         | BA7                  | Injection Volume: | 20.00    |
| Injection Type:      | Unknown              | Channel:          | UV_VIS_1 |
| Calibration Level:   |                      | Wavelength:       | 210.0    |
| Instrument Method:   | ASH 9010 HEXIPA 1 50 | Bandwidth:        | 4        |
| Processing Method:   | EMP_aldolica         | Dilution Factor:  | 1.0000   |
| Injection Date/Time: | 24/ene/24 09:59      | Sample Weight:    | 1.0000   |

### Chromatogram

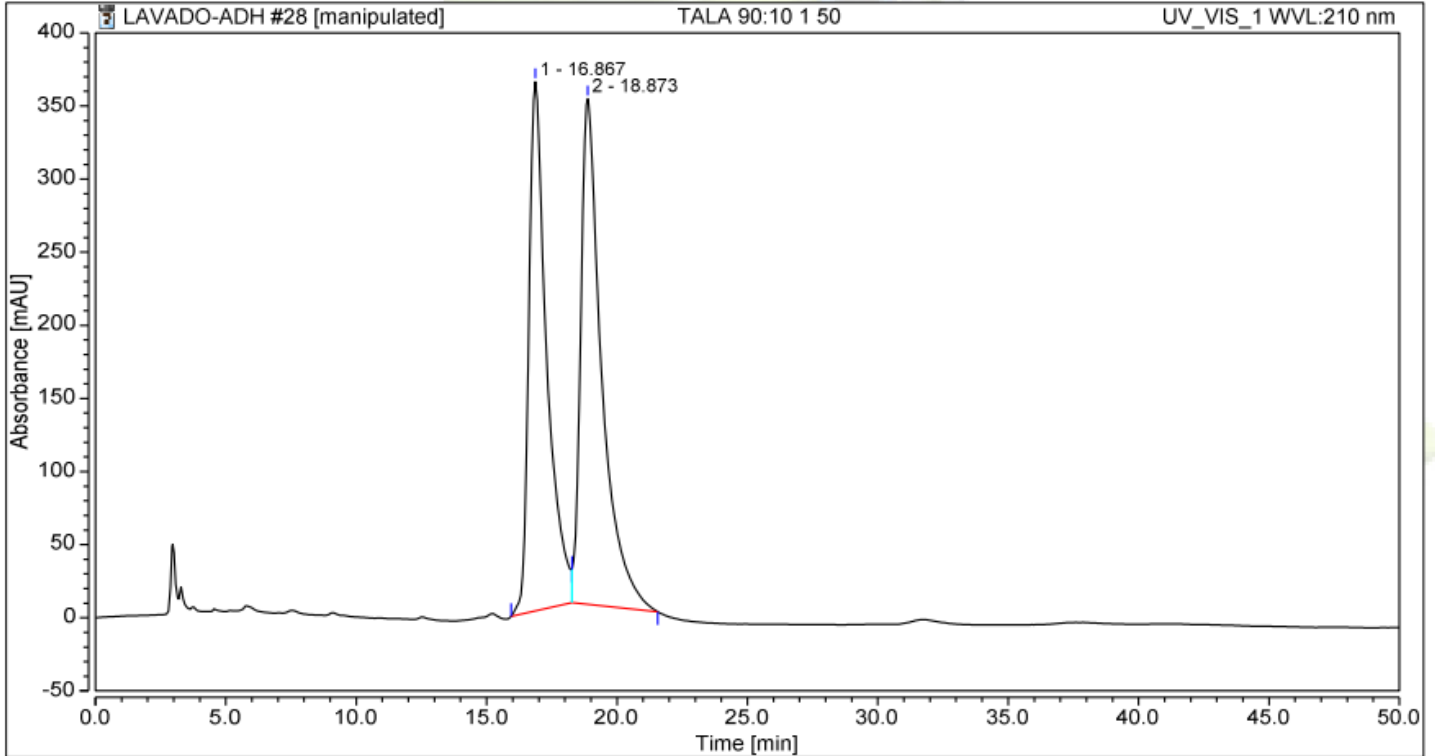

### Integration Results

| No.           | Peak Name | Retention Time min | Area mAU*min   | Height mAU     | Relative Area % | Relative Height % | Amount n.a. |
|---------------|-----------|--------------------|----------------|----------------|-----------------|-------------------|-------------|
| 1             |           | 16.867             | 289.707        | 362.018        | 47.25           | 51.15             | n.a.        |
| 2             |           | 18.873             | 323.405        | 345.695        | 52.75           | 48.85             | n.a.        |
| <b>Total:</b> |           |                    | <b>613.112</b> | <b>707.714</b> | <b>100.00</b>   | <b>100.00</b>     |             |

HPLC condition: Chiralpak® AS-H 150 x 2.1 mm column; hexanes (solvent A): isopropanol (solvent B); isocratic 10% solvent B in 50 min; flow rate = 1.0 mL/min; detection wavelength = 210 nm

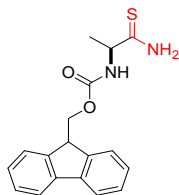



Studies for Determining Racemization of 6g of methyl (S)-3-(2-(((benzyloxy)carbonyl)amino)-3-phenylpropanethioamido)propanoate (9)

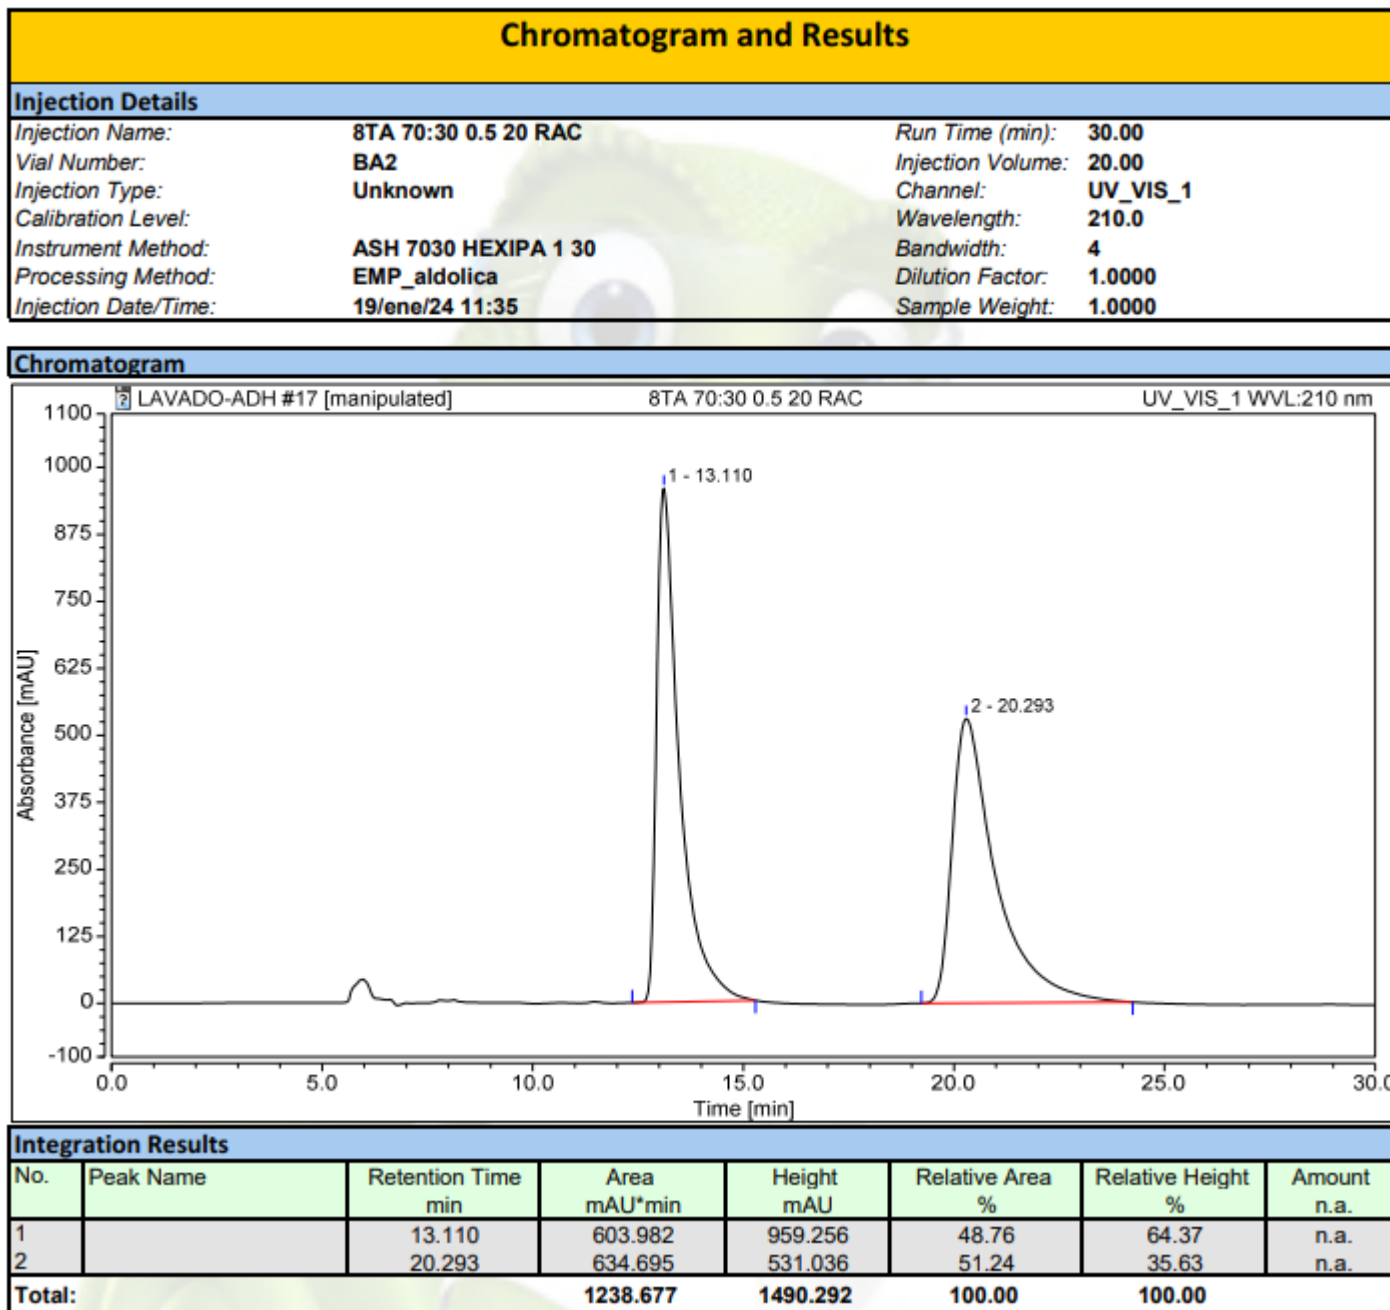

Racemic, HPLC condition: Chiralpak® AS-H 150 x 2.1 mm column; hexanes (solvent A): isopropanol (solvent B); isocratic 30% solvent B in 30 min; flow rate = 1.0 mL/min; detection wavelength = 210 nm

## Chromatogram and Results

### Injection Details

|                      |                      |                   |          |
|----------------------|----------------------|-------------------|----------|
| Injection Name:      | 8TA 70:30 0.5 20 M1  | Run Time (min):   | 30.00    |
| Vial Number:         | BA3                  | Injection Volume: | 20.00    |
| Injection Type:      | Unknown              | Channel:          | UV_VIS_3 |
| Calibration Level:   |                      | Wavelength:       | 210.0    |
| Instrument Method:   | ASH 7030 HEXIPA 1 30 | Bandwidth:        | 4        |
| Processing Method:   | EMP_aldolica         | Dilution Factor:  | 1.0000   |
| Injection Date/Time: | 19/ene/24 12:24      | Sample Weight:    | 1.0000   |

### Chromatogram

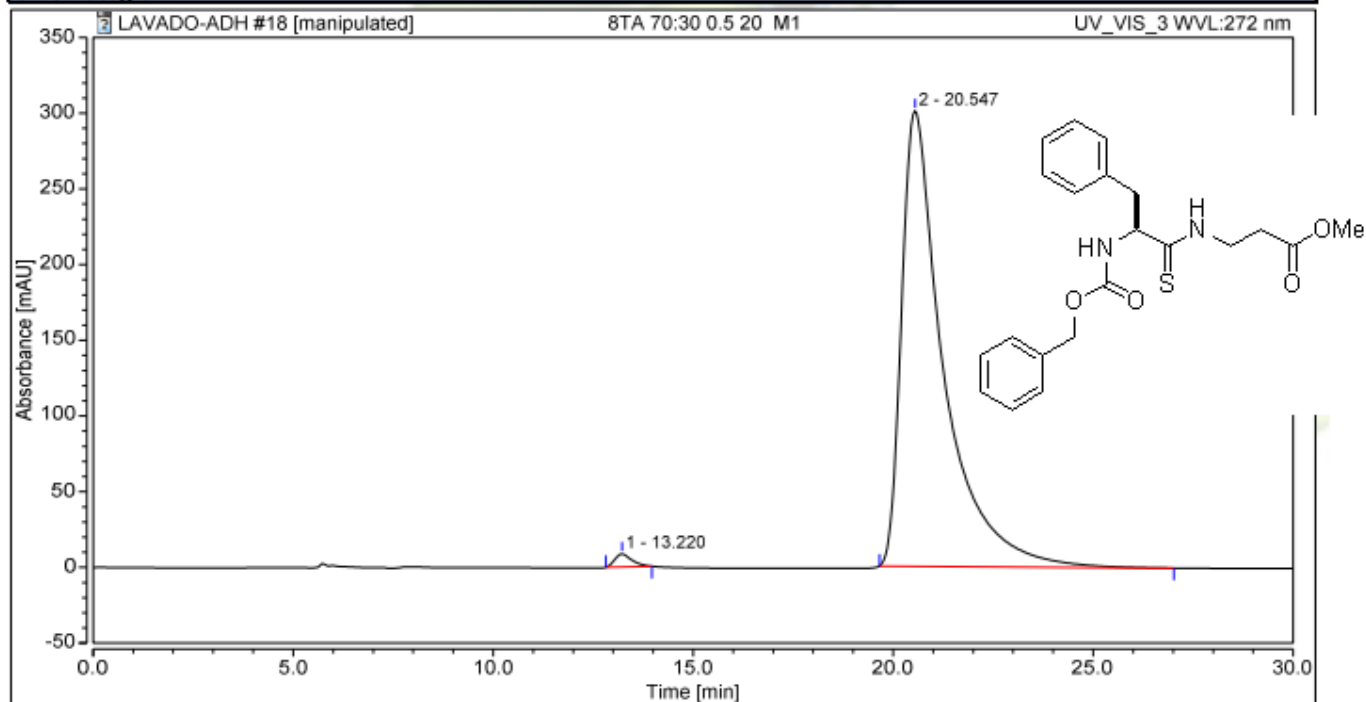

### Integration Results

| No.           | Peak Name | Retention Time<br>min | Area<br>mAU*min | Height<br>mAU  | Relative Area<br>% | Relative Height<br>% | Amount<br>n.a. |
|---------------|-----------|-----------------------|-----------------|----------------|--------------------|----------------------|----------------|
| 1             |           | 13.220                | 4.246           | 8.566          | 1.15               | 2.77                 | n.a.           |
| 2             |           | 20.547                | 365.888         | 300.776        | 98.85              | 97.23                | n.a.           |
| <b>Total:</b> |           |                       | <b>370.134</b>  | <b>309.342</b> | <b>100.00</b>      | <b>100.00</b>        |                |

HPLC condition: Chiralpak® AS-H 150 x 2.1 mm column; hexanes (solvent A): isopropanol (solvent B); isocratic 30% solvent B in 30 min; flow rate = 1.0 mL/min; detection wavelength = 210 nm. 1.5% corresponds to the Purity of the starting amino acid.

## X-Ray Powder Diffraction Analysis

Before performing the monitoring studies of the thionation reactions, we confirmed the crystallographic purity of the starting materials by XRPD experiments. The powder pattern of the purified solid samples was examined and compared with those obtained from the Cambridge Crystallographic Data Centre (CCDC).<sup>4</sup>

Visual comparison of the XRPD patterns after data normalization established a relationship between the crystalline samples and their calculated patterns (Figures S1 and S2). Sharp peaks indicate the absence of additional peaks and rule out the presence of other crystalline phases or solvents in the sample.

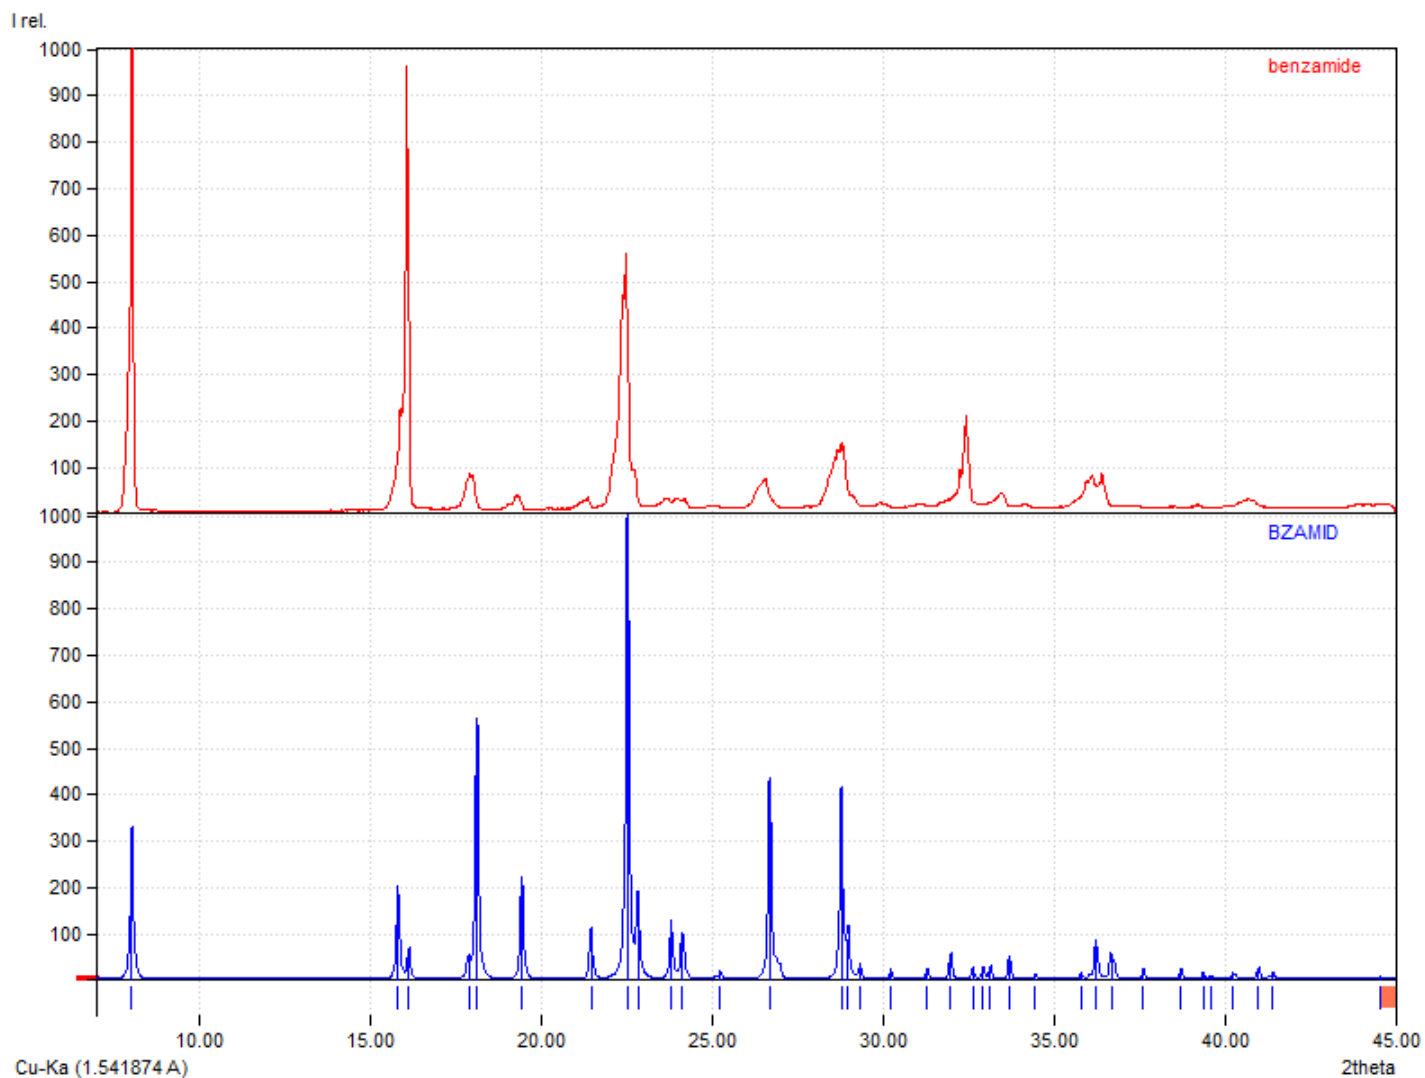

**Figure S1.** XRPD patterns of benzamide: red diffractogram of benzamide obtained benzamide sample (Sigma-Aldrich®), blue diffractogram of benzamide calculated.

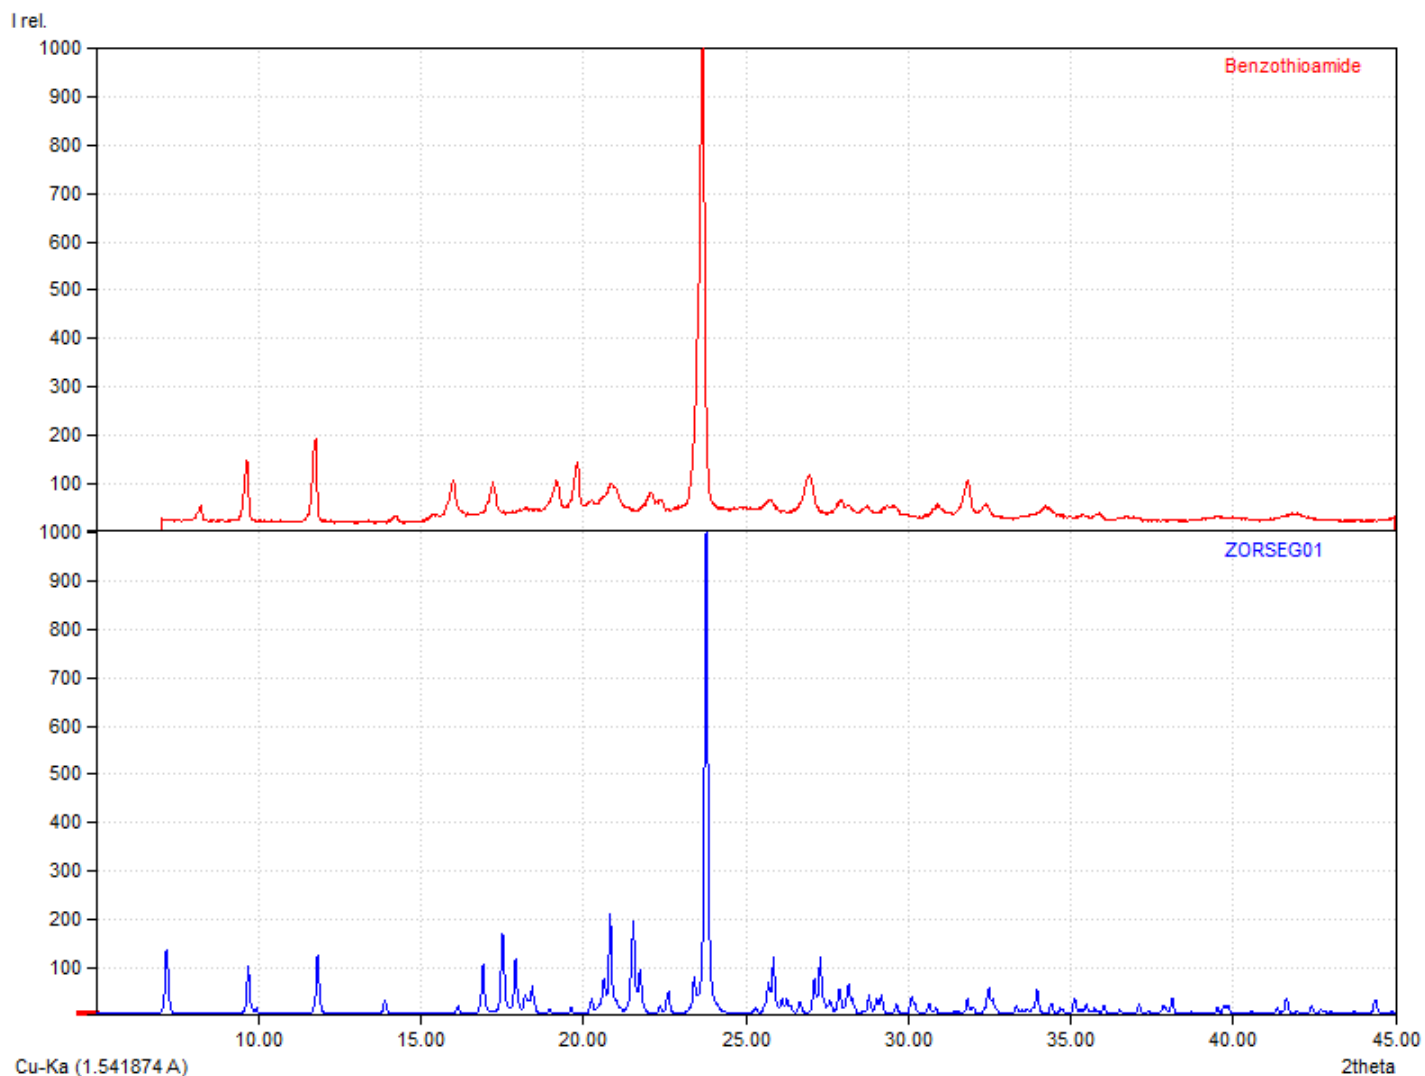

**Figure S2.** PXRD patterns of thio benzamide: red diffractogram obtained after grinding in a Teflon jar milling; blue diffractogram calculated.

$D$ ,  $DOC$ ,  $AC$  parameters were obtained with the Match! program version DEMO 4.0 Build 306.<sup>5</sup> Match! estimates the crystallite size  $D$  (average, in Å) in the sample using the Scherrer formula. Additionally, an instrumental standard of LaB6 was included.

In some cases, the files were plotted with the *Origin* program, Academic Version 2020.

$D$  = average crystallite size (nm)

$DOC$  = Diffraction peaks = Degree of crystallinity

$AC$  = Amorphous phases (Amorphous content weight %)

For the analysis of the degree of crystallinity, in addition to the sample diffraction pattern, the diffraction pattern of the empty sample holder was used under the same experimental conditions. The results are presented in Tables S3.

**Table S3.** Characterization of amides and thioamides from the optimized reaction in Teflon milling jars.

| Amide Crystallite                                                                                                                                                                                                      | X-Ray diffraction patterns (diffractograms) of amide and thioamide                  | Thioamide Crystallite                                                                                                                                   |
|------------------------------------------------------------------------------------------------------------------------------------------------------------------------------------------------------------------------|-------------------------------------------------------------------------------------|---------------------------------------------------------------------------------------------------------------------------------------------------------|
| <p>Benzamide Sigma-Aldrich®<br/> <i>D</i> = average crystallite size (nm) = 710.59 nm<br/>                     Degree of crystallinity (DOC) = 99.23%<br/>                     Amorphous content (weight %) = 0.77</p> | 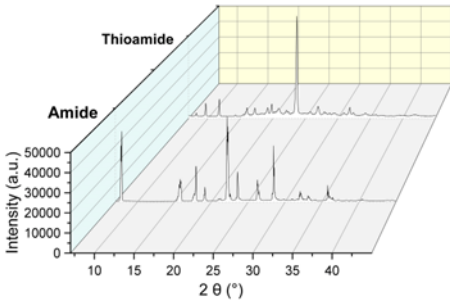   | <p>Benzothioamide (1)<br/> <i>D</i> = 457.66 nm<br/>                     DOC = 49.0%<br/>                     AC = 51.0%</p>                            |
|                                                                                                                                       |                                                                                     |                                                                      |
| <p><i>N</i>-methylbenzamide<br/> <i>D</i> = 72.06 nm<br/>                     DOC = 67.01%<br/>                     AC = 32.99%</p>                                                                                    |   | <p><i>N</i>-methylbenzothioamide (2)<br/> <i>D</i> = 105.89 nm<br/>                     DOC = 62.99%<br/>                     AC = 37.01%</p>           |
|                                                                                                                                      |                                                                                     |                                                                     |
| <p><i>N</i>-(1-phenylethyl)acetamide<br/> <i>D</i> = 114.8 nm<br/>                     DOC = 100%<br/>                     AC = ---</p>                                                                                |                                                                                     | <p><i>N</i>-(1-Phenylethyl)ethanethioamide (3)<br/> <i>D</i> = 782.33 nm<br/>                     DOC = 56.94%<br/>                     AC = 43.06%</p> |
|                                                                                                                                     |  |                                                                    |
| <p>2-(4-isobutylphenyl)propanamide</p>                                                                                                                                                                                 |                                                                                     | <p>Isobutylphenyl)propanethioamide (4)</p>                                                                                                              |



|                                                                                                                                                                                         |                                                                                       |                                                                                                                                                                                                |
|-----------------------------------------------------------------------------------------------------------------------------------------------------------------------------------------|---------------------------------------------------------------------------------------|------------------------------------------------------------------------------------------------------------------------------------------------------------------------------------------------|
| <p><math>D = 23.5 \text{ nm}</math><br/> <math>\text{DOC} = 52.90\%</math><br/> <math>\text{AC} = 47.10\%</math></p>                                                                    | 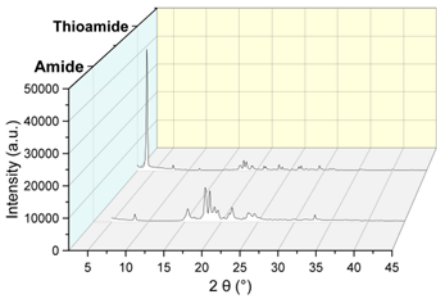     | <p><math>D = 225.2 \text{ nm}</math><br/> <math>\text{DOC} = 43.30\%</math><br/> <math>\text{AC} = 53.70\%</math></p>                                                                          |
|                                                                                                        |      |                                                                                                             |
| <p><b>N-benzylbenzamide</b><br/> <math>D = 29.84 \text{ nm}</math><br/> <math>\text{DOC} = 62.01\%</math><br/> <math>\text{AC} = 37.99\%</math></p>                                     |     | <p><b>N-Benzylbenzothioamide (5)</b><br/> <math>D = 539.85 \text{ nm}</math><br/> <math>\text{DOC} = 99.81\%</math><br/> <math>\text{AC} = 0.19\%</math></p>                                   |
|                                                                                                       |   | <p>.19</p>                                                                                                                                                                                     |
| <p><b>(9H-fluoren-9-yl)methyl (2-amino-2-oxoethyl)carbamate</b><br/> <math>D = 34.81 \text{ nm}</math><br/> <math>\text{DOC} = 48.33\%</math><br/> <math>\text{AC} = 51.67\%</math></p> |    | <p><b>(9H-Fluoren-9-yl)methyl (2-amino-2-thioxoethyl)carbamate (7)</b><br/> <math>D = 215.8 \text{ nm}</math><br/> <math>\text{DOC} = 44.99\%</math><br/> <math>\text{AC} = 55.01\%</math></p> |
|                                                                                                      |  |                                                                                                           |
| <p><b>(9H-fluoren-9-yl)methyl (1-amino-1-oxopropan-2-</b></p>                                                                                                                           |    | <p><b>(9H-Fluoren-9-yl)methyl (S)-(1-amino-1-thioxopropan-2-yl)carbamate (8)</b><br/> <math>D = 77.18 \text{ nm}</math></p>                                                                    |

yl)carbamate

$D = 35.18 \text{ nm}$

DOC = 48.83%

AC = 1.17%

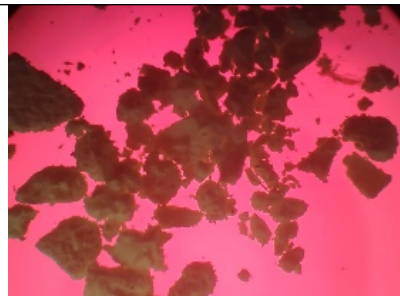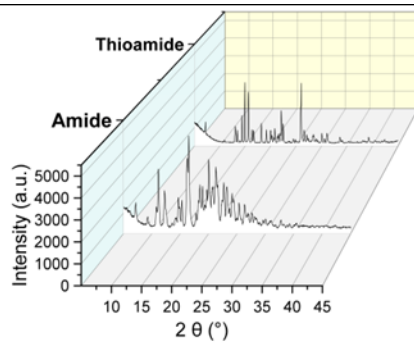

DOC = 30.74%

AC = 69.26%

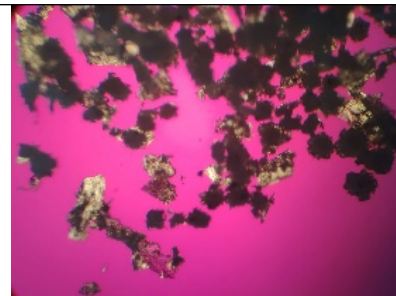

(*S*)-1-benzoyl-2-(*tert*-butyl)-2,3-dihydropyrimidin-4(1H)-one

$D = 97.42 \text{ nm}$

DOC = 62.77%

AC = 7.23%

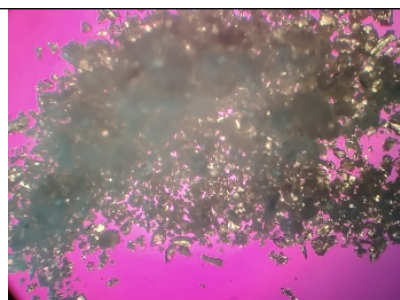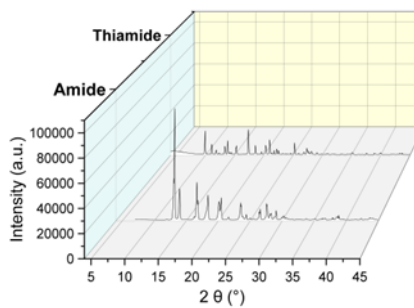

(*S*)-(2-(*tert*-Butyl)-4-thioxo-3,4-dihydropyrimidin-1(2H)-yl)(phenyl)methanone (**11**)

$D = 408.4 \text{ nm}$

DOC = 42.20%

AC = 57.80%

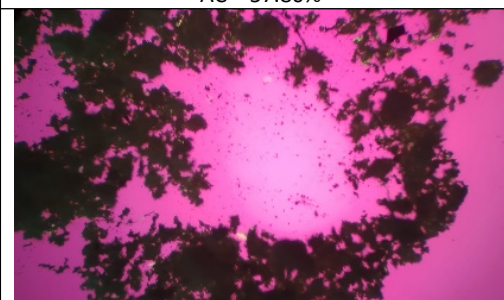

## References

1. S. Wang, X. Zhao, D. Zhang-Negrerie and Y. Du, *Org. Chem. Front.*, 2019, **6**, 347–351
2. T. Ezawa, Y. Kawashima, T. Noguchi, S. Jung and N. Imai, *Tetrahedron Asymmetry*, 2017, **28**, 1690–1699.
3. H. S. Lalithamba, K. Uma, T. S. Gowthami and G. Nagendra, *Org. Prep. Proced. Int.*, 2020, **52**, 181–191.
4. C. R. Groom, I. J. Bruno, M. P. Lightfoot and S. C. Ward, *Acta Cryst.*, 2016. **B72**, 171-179
5. H. Putz, Dr. K. Brandenburg GbR, Kreuzherrenstr. Germany 2023-2024 **102**, 53227 Bonn, <https://www.crystalimpact.de/match>.
